# Supplementary material
Source: PubMed Central journal article supplement (PMC7993490)
Supplement: 13578_2021_568_MOESM1_ESM.pdf [file 13578_2021_568_MOESM1_ESM.pdf]

**SUPPLEMENTAL MATERIAL**

**Supplemental Figures:**

**Figure S1. Cellular distribution of mCi-ER alone in COS7 cells.** The images of mCi-ER (green) with DAPI (blue) and mCi-ER alone are provided here as a control for Figure 2.

**Figure S2. Orf6 is not localized on the early- or late- endosomes.** COS-7 cells co-transfected with Orf6-mCh and the indicated mCi-tagged Rab proteins were imaged by confocal microscopy: A. Orf6-mCh with mCi-Rab5a (early endosome); B. Orf6-mCh with mCi-Rab7a (late endosome); and, C. Orf6-mCh with mCi-Rab9a (late endosome).

**Supplemental Tables:**

**Table S1. Predicted topology and subcellular localization of SARS-CoV-2 proteins.** In brackets, amino acid location of topological domain. C-term, C-terminus; ER, endoplasmic reticulum; Nsp, non-structural protein; N-term, N-terminus; Orf, accessory protein; TM, transmembrane.

**Table S2. Gene Ontologies based on host-interacting proteins of Orf6.**

A table with the Gene Ontologies listed in Figure 4, and the host proteins associated with each ontology.

**Figure S1**

**mCi-ER with DAPI (blue)**

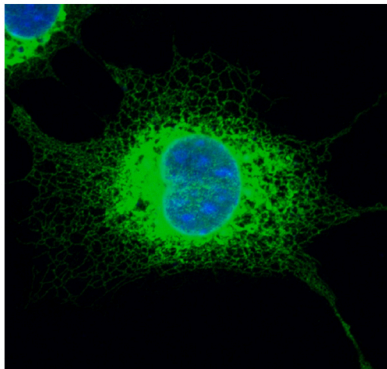

**mCi-ER alone**

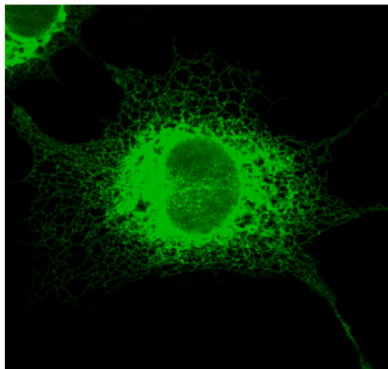

**Figure S2.**

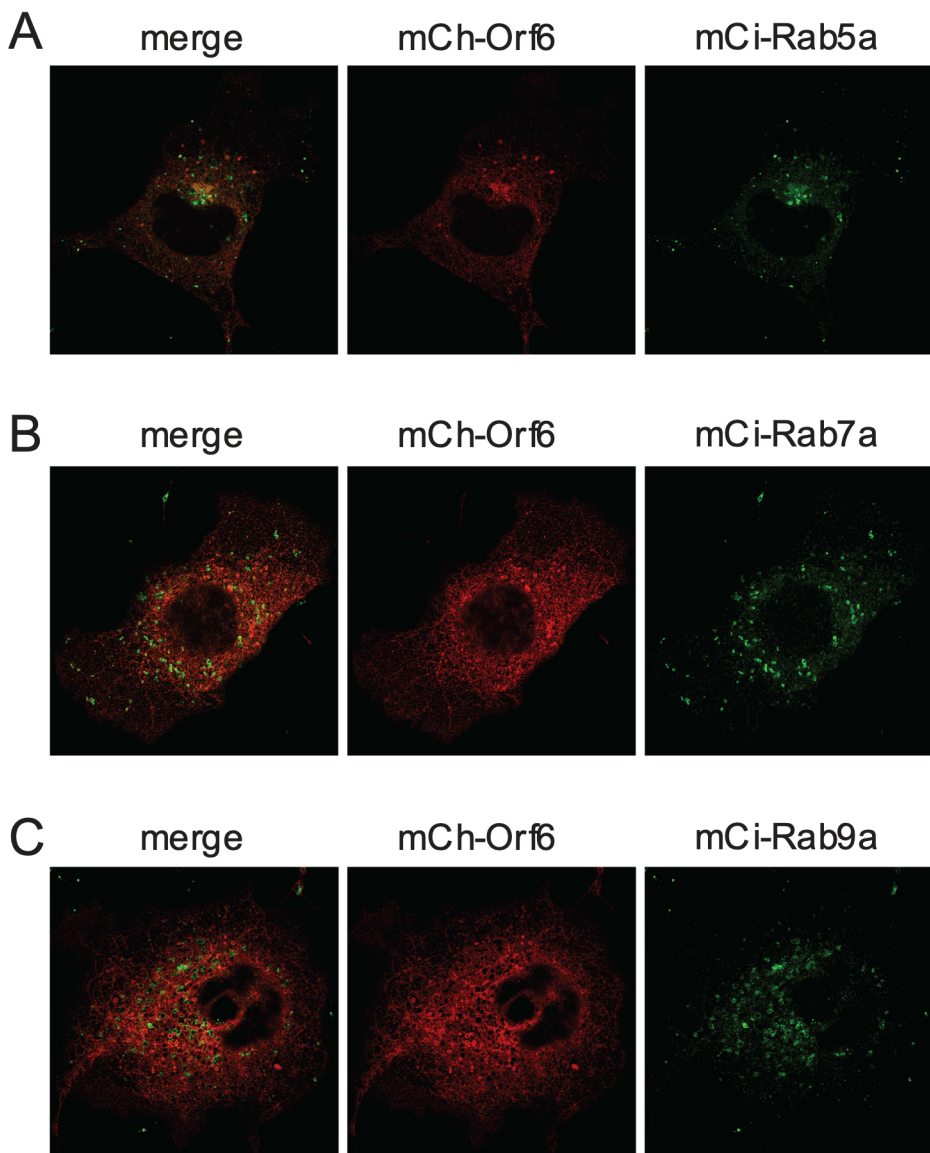

**MANUSCRIPT: Lee *et al.* SARS-CoV-2 protein cytotoxicity, Orf6 host interaction**

**Supplemental Table S1. Predicted topology and subcellular localization of SARS-CoV-2 proteins.**

| SARS-CoV-2 genes | # of amino acids | Topological domains           | Predicted topology and subcellular localization                          |
|------------------|------------------|-------------------------------|--------------------------------------------------------------------------|
| Nsp1             | 180              | N/A                           | cytosol                                                                  |
| Nsp2             | 638              | N/A                           | cytosol                                                                  |
| Nsp3             | 1945             | 2 TM domains                  | cytoplasmic N-term (1-1047) & cytoplasmic C-term (1521-1945) on membrane |
| Nsp4             | 500              | 4 TM domains                  | cytoplasmic N-term (1-13) & cytoplasmic C-term (386-500) on membrane     |
| Nsp5             | 306              | N/A                           | cytosol                                                                  |
| Nsp6             | 290              | 6 TM domains                  | cytoplasmic N-term (1-17) & cytoplasmic C-term (231-290) on membrane     |
| Nsp7             | 83               | N/A                           | cytosol                                                                  |
| Nsp8             | 198              | N/A                           | cytosol                                                                  |
| Nsp9             | 113              | N/A                           | cytosol                                                                  |
| Nsp10            | 139              | N/A                           | cytosol                                                                  |
| Nsp11            | 13               | N/A                           | cytosol                                                                  |
| Nsp12            | 932              | N/A                           | cytosol                                                                  |
| Nsp13            | 601              | N/A                           | cytosol                                                                  |
| Nsp14            | 527              | N/A                           | cytosol                                                                  |
| Nsp15            | 346              | N/A                           | cytosol                                                                  |
| Nsp16            | 298              | N/A                           | cytosol                                                                  |
| S                | 1273             | signal peptide, 1 TM domains  | luminal (13-1213) N-term & cytoplasmic C-term (1235-1273) on membrane    |
| E                | 75               | 1 TM domains                  | luminal (1-16) N-term & cytoplasmic C-term (38-75) on membrane           |
| M                | 222              | 3 TM domains                  | luminal (2-19) N-term & cytoplasmic C-term (101-222) on membrane         |
| N                | 419              | N/A                           | cytosol                                                                  |
| Orf3a            | 275              | 3 TM domains                  | cytoplasmic N-term (1-34) & luminal C-term (115-275) on membrane         |
| Orf3b            | 57               | N/A                           | cytosol                                                                  |
| Orf6             | 61               | membrane-embedded alpha-helix | cytoplasmic C-term on membrane                                           |
| Orf7a            | 121              | signal peptide, 1 TM domain   | luminal (16-95) N-term & cytoplasmic C-term (117-121) on membrane        |
| Orf7b            | 43               | 1 TM domain                   | membrane                                                                 |
| Orf8             | 121              | signal peptide                | lumen of ER or Golgi                                                     |
| Orf9b            | 97               | N/A                           | cytosol                                                                  |
| Orf10            | 38               | N/A                           | cytosol                                                                  |

**MANUSCRIPT: Lee *et al.* SARS-CoV2 protein cytotoxicity, Orf6 host interaction**  
**Supplemental Table S2. Gene Ontologies based n host-interacting proteins of Orf6.**

| GO ID      | Description                                                                                     | Adj. P value | Count | Associated Gene ID                                                                                                                                                                                                                                                                                                                                                                                                                                                                                 |
|------------|-------------------------------------------------------------------------------------------------|--------------|-------|----------------------------------------------------------------------------------------------------------------------------------------------------------------------------------------------------------------------------------------------------------------------------------------------------------------------------------------------------------------------------------------------------------------------------------------------------------------------------------------------------|
| GO:0006402 | mRNA catabolic process                                                                          | 1.16634E-44  | 78    | XPO1/PSMD2/PSMD1/PSMC3/PSMC4/PSMC5/PSMC1/PSMC2/PSMD13/PSMC6/PSMD12/TNRC6B/PSMA2/PSMD7/PSMD11/PSMB4/PSMD14/HNRNPU/PSMB1/RPSA/PSMB3/PABPC1/RPL3/PPP2R1A/PSMA5/RPL6/PSMA7/PSMA1/HNRNPM/PSMA4/RPS4X/RPL23/PSMB7/PSMD8/THRAP3/PABPC4/PSMD4/RPS8/RPS18/RPL21/RPS15/PSMA6/PSMA3/ZC3HAV1/RPL5/PSMB2/RPL10/RPS5/RPS3A/DHX9/RPS19/PSME3/RPL8/RPL27/PSMB6/HNRNPA0/RPL15/RPL12/RPL14/RPS13/RPL24/RPL11/TARDBP/RPS28/RPS25/RPS26/RPL10A/VIM/RPS23/RPL36/CNOT1/HNRNPD/RPS9/RPL28/RPL23A/RPL35/RPL30/RPS29        |
| GO:0006401 | RNA catabolic process                                                                           | 1.00145E-42  | 79    | XPO1/PSMD2/PSMD1/PSMC3/PSMC4/PSMC5/PSMC1/PSMC2/PSMD13/PSMC6/PSMD12/TNRC6B/PSMA2/PSMD7/PSMD11/PSMB4/PSMD14/LRPPRC/HNRNPU/PSMB1/RPSA/PSMB3/PABPC1/RPL3/PPP2R1A/PSMA5/RPL6/PSMA7/PSMA1/HNRNPM/PSMA4/RPS4X/RPL23/PSMB7/PSMD8/THRAP3/PABPC4/PSMD4/RPS8/RPS18/RPL21/RPS15/PSMA6/PSMA3/ZC3HAV1/RPL5/PSMB2/RPL10/RPS5/RPS3A/DHX9/RPS19/PSME3/RPL8/RPL27/PSMB6/HNRNPA0/RPL15/RPL12/RPL14/RPS13/RPL24/RPL11/TARDBP/RPS28/RPS25/RPS26/RPL10A/VIM/RPS23/RPL36/CNOT1/HNRNPD/RPS9/RPL28/RPL23A/RPL35/RPL30/RPS29 |
| GO:0019080 | viral gene expression                                                                           | 4.29198E-33  | 51    | PSMC3/NUP188/NUP160/EIF3B/RANBP2/EIF3A/NUP93/RPSA/RPL3/RPL6/RPS4X/RPL23/RPS8/PCBP2/RPS18/RPL21/RPS15/NUP210/RPL5/EIF3F/RPL10/RPS5/RPS3A/DHX9/RPS19/RPL8/RPL27/RPL15/RPL12/NUP37/RPL14/PTBP1/RPS13/RPL24/RPL11/TARDBP/RPS28/RPS25/RPS26/EIF3G/RPL10A/RPS23/RPL36/RPS9/RPL28/RPL23A/SMARCA4/RAE1/RPL35/RPL30/RPS29                                                                                                                                                                                   |
| GO:0006413 | translational initiation                                                                        | 1.09138E-31  | 50    | EIF4B/EIF3B/EIF3A/RPSA/PABPC1/RPL3/RPL6/RPS4X/RPL23/RPS8/RPS18/RPL21/RPS15/EIF3I/EIF3M/DDX3X/RPL5/EIF3F/RPL10/RPS5/RPS3A/RPS19/EIF2S3/RPL8/PPP1CA/EIF3H/RPL27/RPL15/RPL12/RPL14/RPS13/RPL24/RPL11/RPS28/RPS25/RPS26/EIF3G/EIF2B3/RPL10A/RPS23/RPL36/RPS9/RPL28/EIF5/RPL23A/EIF2B5/RPL35/CDC123/RPL30/RPS29                                                                                                                                                                                         |
| GO:0002479 | antigen processing and presentation of exogenous peptide antigen via MHC class I, TAP-dependent | 1.01826E-28  | 33    | PSMD2/PSMD1/PSMC3/PSMC4/PSMC5/PSMC1/PSMC2/PSMD13/PSMC6/PSMD12/PSMA2/PSMD7/PSMD11/PSMB4/PSMD14/HLA-A/PSMB1/PSMB3/PSMA5/PSMA7/PSMA1/PSMA4/CALR/PSMB7/PSMD8/PSMD4/PSMA6/PSMA3/PDIA3/PSMB2/PSME3/SEC22B/PSMB6                                                                                                                                                                                                                                                                                          |

|            |                                                                                  |             |    |                                                                                                                                                                                                                                                                              |
|------------|----------------------------------------------------------------------------------|-------------|----|------------------------------------------------------------------------------------------------------------------------------------------------------------------------------------------------------------------------------------------------------------------------------|
| GO:0072599 | establishment of protein localization to endoplasmic reticulum                   | 5.27351E-28 | 39 | HSPA5/RPSA/RPL3/RPL6/RPS4X/RPL23/RPS8/RPS18/RPL21/RPS15/SEC61A1/RPL5/RPL10/RPS5/RPS3A/RPS19/RPL8/SPCS2/RPL27/RPL15/RPL12/RPL14/RPS13/RAB10/RPL24/RPL11/RPS28/RPS25/RPS26/RPL10A/RPS23/RPL36/RPS9/RPL28/RPL23A/RPL35/SEC61B/RPL30/RPS29                                       |
| GO:0019083 | viral transcription                                                              | 7.51199E-28 | 45 | PSMC3/NUP188/NUP160/RANBP2/NUP93/RPSA/RPL3/RPL6/RPS4X/RPL23/RPS8/RPS18/RPL21/RPS15/NUP210/RPL5/RPL10/RPS5/RPS3A/DHX9/RPS19/RPL8/RPL27/RPL15/RPL12/NUP37/RPL14/RPS13/RPL24/RPL11/TARDBP/RPS28/RPS25/RPS26/RPL10A/RPS23/RPL36/RPS9/RPL28/RPL23A/SMARCA4/RAE1/RPL35/RPL30/RPS29 |
| GO:0042590 | antigen processing and presentation of exogenous peptide antigen via MHC class I | 8.49369E-28 | 33 | PSMD2/PSMD1/PSMC3/PSMC4/PSMC5/PSMC1/PSMC2/PSMD13/PSMC6/PSMD12/PSMA2/PSMD7/PSMD11/PSMB4/PSMD14/HLA-A/PSMB1/PSMB3/PSMA5/PSMA7/PSMA1/PSMA4/CALR/PSMB7/PSMD8/PSMD4/PSMA6/PSMA3/PDIA3/PSMB2/PSME3/SEC22B/PSMB6                                                                    |
| GO:0006613 | cotranslational protein targeting to membrane                                    | 1.57293E-27 | 37 | RPSA/RPL3/RPL6/RPS4X/RPL23/RPS8/RPS18/RPL21/RPS15/SEC61A1/RPL5/RPL10/RPS5/RPS3A/RPS19/RPL8/RPL27/RPL15/SSR1/RPL12/RPL14/RPS13/RPL24/RPL11/RPS28/RPS25/RPS26/RPL10A/RPS23/RPL36/RPS9/RPL28/RPL23A/RPL35/SEC61B/RPL30/RPS29                                                    |
| GO:0045047 | protein targeting to ER                                                          | 2.33952E-27 | 38 | HSPA5/RPSA/RPL3/RPL6/RPS4X/RPL23/RPS8/RPS18/RPL21/RPS15/SEC61A1/RPL5/RPL10/RPS5/RPS3A/RPS19/RPL8/SPCS2/RPL27/RPL15/RPL12/RPL14/RPS13/RPL24/RPL11/RPS28/RPS25/RPS26/RPL10A/RPS23/RPL36/RPS9/RPL28/RPL23A/RPL35/SEC61B/RPL30/RPS29                                             |
| GO:0006614 | SRP-dependent cotranslational protein targeting to membrane                      | 6.76412E-27 | 36 | RPSA/RPL3/RPL6/RPS4X/RPL23/RPS8/RPS18/RPL21/RPS15/SEC61A1/RPL5/RPL10/RPS5/RPS3A/RPS19/RPL8/RPL27/RPL15/RPL12/RPL14/RPS13/RPL24/RPL11/RPS28/RPS25/RPS26/RPL10A/RPS23/RPL36/RPS9/RPL28/RPL23A/RPL35/SEC61B/RPL30/RPS29                                                         |
| GO:0070498 | interleukin-1-mediated signaling pathway                                         | 1.93461E-26 | 35 | PSMD2/OTUD4/PSMD1/PSMC3/PSMC4/PSMC5/PSMC1/PSMC2/PSMD13/PSMC6/PSMD12/MAP3K7/PSMA2/PSMD7/PSMD11/PSMB4/PSMD14/PSMB1/PSMB3/TAB2/SQSTM1/TAB3/PSMA5/PSMA7/PSMA1/PSMA4/PSMB7/PSMD8/PSMD4/PSMA6/PSMA3/PSMB2/PSME3/PSMB6/SKP1                                                         |
| GO:0006521 | regulation of cellular amino acid metabolic process                              | 6.48498E-26 | 29 | PSMD2/PSMD1/PSMC3/PSMC4/PSMC5/PSMC1/PSMC2/PSMD13/PSMC6/PSMD12/PSMA2/PSMD7/PSMD11/PSMB4/PSMD14/PSMB1/PSMB3/PSMA5/PSMA7/PSMA1/PSMA4/PSMB7/PSMD8/PSMD4/PSMA6/PSMA3/PSMB2/PSME3/PSMB6                                                                                            |
| GO:0002474 | antigen processing and presentation of peptide antigen via MHC class I           | 8.1474E-26  | 34 | PSMD2/CANX/PSMD1/PSMC3/PSMC4/PSMC5/PSMC1/PSMC2/PSMD13/PSMC6/PSMD12/PSMA2/PSMD7/PSMD11/PSMB4/PSMD14/HLA-A/PSMB1/PSMB3/PSMA5/PSMA7/PSMA1/PSMA4/CALR/PSMB7/PSMD8/PSMD4/PSMA6/PSMA3/PDIA3/PSMB2/PSME3/SEC22B/PSMB6                                                               |
| GO:0070972 | protein localization to endoplasmic reticulum                                    | 1.01813E-25 | 40 | HSPA5/RPSA/RPL3/UBAC2/RPL6/RPS4X/RPL23/RPS8/RPS18/RPL21/RPS15/SEC61A1/RPL5/RPL10/RPS5/RPS3A/RPS19/RPL8/SPCS2/RPL27/RPL15/RPL12/RPL14/RPS13/RAB10/RPL24/RPL11/RPS28/RPS25/RPS26/RPL10A/RPS23/RPL36/RPS9/RPL28/RPL23A/RPL35/SEC61B/RPL30/RPS29                                 |

|            |                                                                                    |             |    |                                                                                                                                                                                                                                                                                                                                                                                                   |
|------------|------------------------------------------------------------------------------------|-------------|----|---------------------------------------------------------------------------------------------------------------------------------------------------------------------------------------------------------------------------------------------------------------------------------------------------------------------------------------------------------------------------------------------------|
| GO:0022618 | ribonucleoprotein complex assembly                                                 | 1.07607E-24 | 51 | PRMT5/EIF4B/PRPF31/WDR77/SNRNP200/HSP90AB1/HSP90AA1/DDX20/CLNS1A/EIF3B/PRPF8/GEMIN4/SF3B1/EIF3A/RPSA/RPL3/RPL6/STRAP/AAR2/RPS15/EIF3I/SMN1/SNRPD2/EIF3M/SNRPB/DDX3X/RPL5/EIF3F/RPL10/RPS5/DHX9/RPS19/EIF2S3/EIF3H/SNRPD3/RPL12/GEMIN5/RPL24/RPL11/RPS28/RPS27L/EIF3G/RPS23/GEMIN6/CNOT1/SNRPF/EIF5/RPL23A/SNRPG/SNRPE/PTGES3                                                                      |
| GO:0071826 | ribonucleoprotein complex subunit organization                                     | 1.39832E-24 | 52 | PRMT5/VCP/EIF4B/PRPF31/WDR77/SNRNP200/HSP90AB1/HSP90AA1/DDX20/CLNS1A/EIF3B/PRPF8/GEMIN4/SF3B1/EIF3A/RPSA/RPL3/RPL6/STRAP/AAR2/RPS15/EIF3I/SMN1/SNRPD2/EIF3M/SNRPB/DDX3X/RPL5/EIF3F/RPL10/RPS5/DHX9/RPS19/EIF2S3/EIF3H/SNRPD3/RPL12/GEMIN5/RPL24/RPL11/RPS28/RPS27L/EIF3G/RPS23/GEMIN6/CNOT1/SNRPF/EIF5/RPL23A/SNRPG/SNRPE/PTGES3                                                                  |
| GO:0000184 | nuclear-transcribed mRNA catabolic process, nonsense-mediated decay                | 1.49484E-24 | 36 | RPSA/PABPC1/RPL3/PPP2R1A/RPL6/RPS4X/RPL23/RPS8/RPS18/RPL21/RPS15/RPL5/RPL10/RPS5/RPS3A/RPS19/RPL8/RPL27/RPL15/RPL12/RPL14/RPS13/RPL24/RPL11/RPS28/RPS25/RPS26/RPL10A/RPS23/RPL36/RPS9/RPL28/RPL23A/RPL35/RPL30/RPS29                                                                                                                                                                              |
| GO:0031145 | anaphase-promoting complex-dependent catabolic process                             | 1.51979E-24 | 31 | PSMD2/PSMD1/PSMC3/PSMC4/PSMC5/PSMC1/PSMC2/PSMD13/PSMC6/PSMD12/PSMA2/PSMD7/PSMD11/PSMB4/PSMD14/PSMB1/PSMB3/PSMA5/PSMA7/PSMA1/PSMA4/PSMB7/PSMD8/PSMD4/PSMA6/PSMA3/PSMB2/CDK1/PSME3/PSMB6/PLK1                                                                                                                                                                                                       |
| GO:0090150 | establishment of protein localization to membrane                                  | 1.94617E-24 | 55 | HSPA5/SPTBN1/BAG6/HSP90AA1/NMT1/STOM/RPSA/RPL3/RPL6/RACK1/RPS4X/GET4/RPL23/RPS8/RPS18/RPL21/RPS15/SEC61A1/RPL5/UBL4A/RPL10/SAMM50/RPS5/RPS3A/RPS19/RPL8/RPL27/CHP1/RPL15/SSR1/AGK/RPL12/MFF/RPL14/RPS13/RAB10/RPL24/RPL11/EXOC4/RPS28/RPS25/RPS26/TFDP1/RPL10A/RPS23/NDUFA13/RPL36/PEX3/RPS9/RPL28/RPL23A/RPL35/SEC61B/RPL30/RPS29                                                                |
| GO:0010498 | proteasomal protein catabolic process                                              | 2.39351E-24 | 65 | VCP/HSPA5/PSMD2/PSMD1/PSMC3/HSP90AB1/BAG6/PSMC4/PSMC5/PSMC1/PSMC2/FAF2/PSMD13/PSMC6/ECPAS/PSMD12/NPLOC4/ERLIN2/PSMA2/PSMD7/PSMD11/PSMB4/PSMD14/ERLIN1/RAD23B/PSMB1/LTN1/HSP90B1/DDB1/PSMB3/UBAC2/PSMA5/RACK1/PSMA7/PSMA1/STT3B/PSMA4/GET4/PSMB7/PSMD8/CCDC47/PSMD4/PCBP2/AMFR/PSMA6/PSMA3/AUP1/HM13/UF1/FBXW5/PSMB2/CDK1/PSME3/PSMB6/SKP1/PRKACA/CLU/OGT/RPL11/STUB1/CAV1/DERL1/TMTC3/SEC61B/PLK1 |
| GO:0061418 | regulation of transcription from RNA polymerase II promoter in response to hypoxia | 5.94988E-24 | 30 | PSMD2/PSMD1/PSMC3/PSMC4/PSMC5/PSMC1/PSMC2/PSMD13/PSMC6/PSMD12/PSMA2/PSMD7/PSMD11/PSMB4/PSMD14/PSMB1/PSMB3/PSMA5/PSMA7/PSMA1/PSMA4/PSMB7/PSMD8/PSMD4/PSMA6/PSMA3/PSMB2/PSME3/ELOC/PSMB6                                                                                                                                                                                                            |

|            |                                                                   |             |    |                                                                                                                                                                                                                                                                                                                                                                       |
|------------|-------------------------------------------------------------------|-------------|----|-----------------------------------------------------------------------------------------------------------------------------------------------------------------------------------------------------------------------------------------------------------------------------------------------------------------------------------------------------------------------|
| GO:0002478 | antigen processing and presentation of exogenous peptide antigen  | 1.26875E-23 | 41 | PSMD2/CANX/PSMD1/PSMC3/PSMC4/PSMC5/PSMC1/PSMC2/PSMD13/PSMC6/PSMD12/PSMA2/PSMD7/PSMD11/PSMB4/PSMD14/HLA-A/PSMB1/PSMB3/PSMA5/CLTC/PSMA7/PSMA1/PSMA4/CALR/PSMB7/PSMD8/PSMD4/ACTR1A/PSMA6/PSMA3/PDIA3/PSMB2/PSME3/SEC22B/PSMB6/DYNC1I2/KIF5A/DCTN2/CAPZA1/RAB7A                                                                                                           |
| GO:1902036 | regulation of hematopoietic stem cell differentiation             | 1.41408E-23 | 29 | PSMD2/PSMD1/PSMC3/PSMC4/PSMC5/PSMC1/PSMC2/PSMD13/PSMC6/PSMD12/PSMA2/PSMD7/PSMD11/PSMB4/PSMD14/PSMB1/PSMB3/PSMA5/PSMA7/PSMA1/PSMA4/PSMB7/PSMD8/PSMD4/PSMA6/PSMA3/PSMB2/PSME3/PSMB6                                                                                                                                                                                     |
| GO:0043161 | proteasome-mediated ubiquitin-dependent protein catabolic process | 2.10569E-23 | 60 | VCP/HSPA5/PSMD2/PSMD1/PSMC3/HSP90AB1/BAG6/PSMC4/PSMC5/PSMC1/PSMC2/FAF2/PSMD13/PSMC6/ECPAS/PSMD12/NPLOC4/ERLIN2/PSMA2/PSMD7/PSMD11/PSMB4/PSMD14/ERLIN1/RAD23B/PSMB1/LTN1/HSP90B1/DDB1/PSMB3/PSMA5/RACK1/PSMA7/PSMA1/STT3B/PSMA4/PSMB7/PSMD8/CCDC47/PSMD4/PCBP2/AMFR/PSMA6/PSMA3/AUP1/UFD1/FBXW5/PSMB2/CDK1/PSME3/PSMB6/SKP1/CLU/OGT/RPL11/STUB1/CAV1/DERL1/SEC61B/PLK1 |
| GO:0061013 | regulation of mRNA catabolic process                              | 2.32655E-23 | 43 | XPO1/PSMD2/PSMD1/PSMC3/PSMC4/PSMC5/PSMC1/PSMC2/PSMD13/PSMC6/PSMD12/TNRC6B/PSMA2/PSMD7/PSMD11/PSMB4/PSMD14/HNRNPU/PSMB1/PSMB3/PABPC1/PSMA5/PSMA7/PSMA1/HNRNPM/PSMA4/PSMB7/PSMD8/THRAP3/PABPC4/PSMD4/PSMA6/PSMA3/ZC3HAV1/PSMB2/DHX9/PSME3/PSMB6/HNRNPA0/TARDBP/VIM/CNOT1/HNRNPD                                                                                         |
| GO:0002223 | stimulatory C-type lectin receptor signaling pathway              | 4.23803E-23 | 34 | PSMD2/PSMD1/PSMC3/PSMC4/PSMC5/PSMC1/PSMC2/PSMD13/PSMC6/PSMD12/MAP3K7/PSMA2/PSMD7/PSMD11/PSMB4/PSMD14/PSMB1/PSMB3/TAB2/TAB3/PSMA5/PSMA7/PSMA1/PSMA4/PSMB7/PSMD8/PSMD4/PSMA6/PSMA3/PSMB2/PSME3/PSMB6/SKP1/PRKACA                                                                                                                                                        |
| GO:0006612 | protein targeting to membrane                                     | 4.45142E-23 | 43 | HSPA5/STOM/RPSA/RPL3/RPL6/RPS4X/RPL23/RPS8/RPS18/RPL21/RPS15/SEC61A1/RPL5/RPL10/RPS5/RPS3A/RPS19/RPL8/RPL27/CHP1/RPL15/SSR1/RPL12/MFF/RPL14/RPS13/RPL24/RPL11/EXOC4/RPS28/RPS25/RPS26/RPL10A/RPS23/RPL36/PEX3/RPS9/RPL28/RPL23A/RPL35/SEC61B/RPL30/RPS29                                                                                                              |
| GO:0019884 | antigen processing and presentation of exogenous antigen          | 6.60263E-23 | 41 | PSMD2/CANX/PSMD1/PSMC3/PSMC4/PSMC5/PSMC1/PSMC2/PSMD13/PSMC6/PSMD12/PSMA2/PSMD7/PSMD11/PSMB4/PSMD14/HLA-A/PSMB1/PSMB3/PSMA5/CLTC/PSMA7/PSMA1/PSMA4/CALR/PSMB7/PSMD8/PSMD4/ACTR1A/PSMA6/PSMA3/PDIA3/PSMB2/PSME3/SEC22B/PSMB6/DYNC1I2/KIF5A/DCTN2/CAPZA1/RAB7A                                                                                                           |



|            |                                                                           |             |    |                                                                                                                                                                                                                                                                                                                                                                      |
|------------|---------------------------------------------------------------------------|-------------|----|----------------------------------------------------------------------------------------------------------------------------------------------------------------------------------------------------------------------------------------------------------------------------------------------------------------------------------------------------------------------|
| GO:0006605 | protein targeting                                                         | 1.11117E-22 | 60 | HUWE1/HSPA5/GCC2/HSP90AA1/LMAN1/STOM/RPSA/RPL3/TOMM40/RPL6/VPS13A/USP9X/RPS4X/HAX1/RPL23/TIMM50/RPS8/RPS18/RPL21/RPS15/TIMM23B/SEC61A1/RPL5/RPL10/SAMM50/RPS5/RPS3A/RPS19/RPL8/SPCS2/RPL27/CHP1/RPL15/SSR1/AGK/RPL12/MFF/RPL14/CLU/RPS13/RPL24/RPL11/EXOC4/RPS28/RPS25/RPS26/AKAP12/RPL10A/RPS23/NDUFA13/RPL36/PEX3/RPS9/RPL28/RPL23A/RAB7A/RPL35/SEC61B/RPL30/RPS29 |
| GO:0002220 | innate immune response activating cell surface receptor signaling pathway | 1.1258E-22  | 34 | PSMD2/PSMD1/PSMC3/PSMC4/PSMC5/PSMC1/PSMC2/PSMD13/PSMC6/PSMD12/MAP3K7/PSMA2/PSMD7/PSMD11/PSMB4/PSMD14/PSMB1/PSMB3/TAB2/TAB3/PSMA5/PSMA7/PSMA1/PSMA4/PSMB7/PSMD8/PSMD4/PSMA6/PSMA3/PSMB2/PSME3/PSMB6/SKP1/PRKACA                                                                                                                                                       |
| GO:0010972 | negative regulation of G2/M transition of mitotic cell cycle              | 2.17526E-22 | 31 | PSMD2/PSMD1/PSMC3/PSMC4/PSMC5/PSMC1/PSMC2/PSMD13/PSMC6/PSMD12/PSMA2/PSMD7/PSMD11/PSMB4/PSMD14/PSMB1/PSMB3/PSMA5/PSMA7/PSMA1/PSMA4/PSMB7/PSMD8/PSMD4/PSMA6/PSMA3/PSMB2/CDK1/PSME3/PSMB6/SKP1                                                                                                                                                                          |
| GO:0043488 | regulation of mRNA stability                                              | 2.42291E-22 | 40 | XPO1/PSMD2/PSMD1/PSMC3/PSMC4/PSMC5/PSMC1/PSMC2/PSMD13/PSMC6/PSMD12/PSMA2/PSMD7/PSMD11/PSMB4/PSMD14/HNRNPU/PSMB1/PSMB3/PABPC1/PSMA5/PSMA7/PSMA1/HNRNPM/PSMA4/PSMB7/PSMD8/THRAP3/PABPC4/PSMD4/PSMA6/PSMA3/PSMB2/DHX9/PSME3/PSMB6/HNRNPA0/TARDBP/VIM/HNRNPD                                                                                                             |
| GO:0048002 | antigen processing and presentation of peptide antigen                    | 3.17933E-22 | 41 | PSMD2/CANX/PSMD1/PSMC3/PSMC4/PSMC5/PSMC1/PSMC2/PSMD13/PSMC6/PSMD12/PSMA2/PSMD7/PSMD11/PSMB4/PSMD14/HLA-A/PSMB1/PSMB3/PSMA5/CLTC/PSMA7/PSMA1/PSMA4/CALR/PSMB7/PSMD8/PSMD4/ACTR1A/PSMA6/PSMA3/PDIA3/PSMB2/PSME3/SEC22B/PSMB6/DYNC1I2/KIF5A/DCTN2/CAPZA1/RAB7A                                                                                                          |
| GO:0031146 | SCF-dependent proteasomal ubiquitin-dependent protein catabolic process   | 4.58311E-22 | 31 | PSMD2/PSMD1/PSMC3/PSMC4/PSMC5/PSMC1/PSMC2/PSMD13/PSMC6/PSMD12/PSMA2/PSMD7/PSMD11/PSMB4/PSMD14/PSMB1/PSMB3/PSMA5/PSMA7/PSMA1/PSMA4/PSMB7/PSMD8/PSMD4/PSMA6/PSMA3/FBXW5/PSMB2/PSME3/PSMB6/SKP1                                                                                                                                                                         |
| GO:0033238 | regulation of cellular amine metabolic process                            | 8.01037E-22 | 29 | PSMD2/PSMD1/PSMC3/PSMC4/PSMC5/PSMC1/PSMC2/PSMD13/PSMC6/PSMD12/PSMA2/PSMD7/PSMD11/PSMB4/PSMD14/PSMB1/PSMB3/PSMA5/PSMA7/PSMA1/PSMA4/PSMB7/PSMD8/PSMD4/PSMA6/PSMA3/PSMB2/PSME3/PSMB6                                                                                                                                                                                    |
| GO:1902750 | negative regulation of cell cycle G2/M phase transition                   | 8.54181E-22 | 32 | PSMD2/PSMD1/PSMC3/PSMC4/PSMC5/PSMC1/PSMC2/PSMD13/PSMC6/PSMD12/PSMA2/PSMD7/PSMD11/PSMB4/PSMD14/PSMB1/PSMB3/PSMA5/PSMA7/PSMA1/PSMA4/PSMB7/PSMD8/PSMD4/PSMA6/PSMA3/PSMB2/CDK1/PSME3/PSMB6/SKP1/PLK1                                                                                                                                                                     |

|            |                                                                                   |             |    |                                                                                                                                                                                                                                                                                                                                      |
|------------|-----------------------------------------------------------------------------------|-------------|----|--------------------------------------------------------------------------------------------------------------------------------------------------------------------------------------------------------------------------------------------------------------------------------------------------------------------------------------|
| GO:0043487 | regulation of RNA stability                                                       | 9.40132E-22 | 40 | XPO1/PSMD2/PSMD1/PSMC3/PSMC4/PSMC5/PSMC1/PSMC2/PSMD13/PSMC6/PSMD12/PSMA2/PSMD7/PSMD11/PSMB4/PSMD14/HNRNPU/PSMB1/PSMB3/PABPC1/PSMA5/PSMA7/PSMA1/HNRNPM/PSMA4/PSMB7/PSMD8/THRAP3/PABPC4/PSMD4/PSMA6/PSMA3/PSMB2/DHX9/PSME3/PSMB6/HNRNPA0/TARDBP/VIM/HNRNPD                                                                             |
| GO:0010389 | regulation of G2/M transition of mitotic cell cycle                               | 1.42529E-21 | 41 | PSMD2/PSMD1/PSMC3/PSMC4/PSMC5/PSMC1/PSMC2/HSP90AA1/PSMD13/PSMC6/PSMD12/PSMA2/PSMD7/PSMD11/PSMB4/PSMD14/PSMB1/CEP250/PSMB3/CKAP5/PPP2R1A/PSMA5/PSMA7/PSMA1/PSMA4/PSMB7/PSMD8/PSMD4/ACTR1A/PSMA6/PSMA3/PSMB2/CDK1/PSME3/PSMB6/DYNC112/SKP1/PRKACA/NDE1/DCTN2/PLK1                                                                      |
| GO:0060218 | hematopoietic stem cell differentiation                                           | 1.81151E-21 | 29 | PSMD2/PSMD1/PSMC3/PSMC4/PSMC5/PSMC1/PSMC2/PSMD13/PSMC6/PSMD12/PSMA2/PSMD7/PSMD11/PSMB4/PSMD14/PSMB1/PSMB3/PSMA5/PSMA7/PSMA1/PSMA4/PSMB7/PSMD8/PSMD4/PSMA6/PSMA3/PSMB2/PSME3/PSMB6                                                                                                                                                    |
| GO:1903311 | regulation of mRNA metabolic process                                              | 2.17375E-21 | 51 | XPO1/PSMD2/PSMD1/PSMC3/PSMC4/PSMC5/PSMC1/HNRNPK/PSMC2/PSMD13/PSMC6/PSMD12/TNRC6B/PSMA2/PSMD7/PSMD11/PSMB4/PSMD14/HNRNPU/PSMB1/PSMB3/PABPC1/PSMA5/PSMA7/PSMA1/HNRNPM/PSMA4/PSMB7/PSMD8/THRAP3/PABPC4/PSMD4/HNRNPL/PSMA6/PSMA3/PRDX6/ZC3HAV1/HNRNPA1/PSMB2/DHX9/PSME3/PSMB6/SNRNP70/HNRNPA0/PTBP1/TARDBP/VIM/CNOT1/HNRNPD/NSRP1/PABPN1 |
| GO:1901532 | regulation of hematopoietic progenitor cell differentiation                       | 3.99565E-21 | 29 | PSMD2/PSMD1/PSMC3/PSMC4/PSMC5/PSMC1/PSMC2/PSMD13/PSMC6/PSMD12/PSMA2/PSMD7/PSMD11/PSMB4/PSMD14/PSMB1/PSMB3/PSMA5/PSMA7/PSMA1/PSMA4/PSMB7/PSMD8/PSMD4/PSMA6/PSMA3/PSMB2/PSME3/PSMB6                                                                                                                                                    |
| GO:0019882 | antigen processing and presentation                                               | 5.35522E-21 | 43 | PSMD2/CANX/PSMD1/PSMC3/PSMC4/PSMC5/PSMC1/PSMC2/PSMD13/PSMC6/PSMD12/PSMA2/PSMD7/PSMD11/PSMB4/PSMD14/HLA-A/PSMB1/PSMB3/PSMA5/CLTC/PSMA7/PSMA1/PSMA4/CALR/PSMB7/PSMD8/PSMD4/ACTR1A/PSMA6/PSMA3/PDIA3/PSMB2/PSME3/SEC22B/PSMB6/DYNC112/RAB10/KIF5A/DCTN2/CAPZA1/RAB7A/RAB32                                                              |
| GO:0043618 | regulation of transcription from RNA polymerase II promoter in response to stress | 8.06561E-21 | 33 | GCN1/HSPA5/PSMD2/PSMD1/PSMC3/PSMC4/PSMC5/PSMC1/PSMC2/PSMD13/PSMC6/PSMD12/PSMA2/PSMD7/PSMD11/PSMB4/PSMD14/PSMB1/PSMB3/PSMA5/PSMA7/PSMA1/PSMA4/PSMB7/PSMD8/PSMD4/DNAJB1/PSMA6/PSMA3/PSMB2/PSME3/ELOC/PSMB6                                                                                                                             |
| GO:1902749 | regulation of cell cycle G2/M phase transition                                    | 4.18987E-20 | 41 | PSMD2/PSMD1/PSMC3/PSMC4/PSMC5/PSMC1/PSMC2/HSP90AA1/PSMD13/PSMC6/PSMD12/PSMA2/PSMD7/PSMD11/PSMB4/PSMD14/PSMB1/CEP250/PSMB3/CKAP5/PPP2R1A/PSMA5/PSMA7/PSMA1/PSMA4/PSMB7/PSMD8/PSMD4/ACTR1A/PSMA6/PSMA3/PSMB2/CDK1/PSME3/PSMB6/DYNC112/SKP1/PRKACA/NDE1/DCTN2/PLK1                                                                      |

|            |                                                                 |             |    |                                                                                                                                                                                                                                                                                                                                                   |
|------------|-----------------------------------------------------------------|-------------|----|---------------------------------------------------------------------------------------------------------------------------------------------------------------------------------------------------------------------------------------------------------------------------------------------------------------------------------------------------|
| GO:0043620 | regulation of DNA-templated transcription in response to stress | 4.41764E-20 | 33 | GCN1/HSPA5/PSMD2/PSMD1/PSMC3/PSMC4/PSMC5/PSMC1/PSMC2/PSMD13/PSMC6/PSMD12/PSMA2/PSMD7/PSMD11/PSMB4/PSMD14/PSMB1/PSMB3/PSMA5/PSMA7/PSMA1/PSMA4/PSMB7/PSMD8/PSMD4/DNAJB1/PSMA6/PSMA3/PSMB2/PSME3/ELOC/PSMB6                                                                                                                                          |
| GO:2000736 | regulation of stem cell differentiation                         | 4.03475E-19 | 31 | PSMD2/PSMD1/PSMC3/PSMC4/PSMC5/PSMC1/PSMC2/PSMD13/PSMC6/PSMD12/PSMA2/PSMD7/PSMD11/PSMB4/PSMD14/HNRNPU/PSMB1/PSMB3/PSMA5/PSMA7/PSMA1/PSMA4/PSMB7/PSMD8/PSMD4/PSMA6/PSMA3/PSMB2/PSME3/PSMB6/SEMA3C                                                                                                                                                   |
| GO:0030177 | positive regulation of Wnt signaling pathway                    | 4.94668E-19 | 37 | VCP/PSMD2/PSMD1/PSMC3/PSMC4/PSMC5/PSMC1/PSMC2/PSMD13/PSMC6/PSMD12/PSMA2/PSMD7/PSMD11/PSMB4/PSMD14/PSMB1/SPIN1/PSMB3/PSMA5/PSMA7/PSMA1/UBR5/PSMA4/ATP6AP2/PSMB7/PSMD8/PSMD4/PSMA6/PSMA3/DDX3X/PSMB2/PSME3/PSMB6/CAV1/SMARCA4/WLS                                                                                                                   |
| GO:0090263 | positive regulation of canonical Wnt signaling pathway          | 5.68463E-19 | 34 | VCP/PSMD2/PSMD1/PSMC3/PSMC4/PSMC5/PSMC1/PSMC2/PSMD13/PSMC6/PSMD12/PSMA2/PSMD7/PSMD11/PSMB4/PSMD14/PSMB1/PSMB3/PSMA5/PSMA7/PSMA1/UBR5/PSMA4/PSMB7/PSMD8/PSMD4/PSMA6/PSMA3/DDX3X/PSMB2/PSME3/PSMB6/CAV1/WLS                                                                                                                                         |
| GO:0060071 | Wnt signaling pathway, planar cell polarity pathway             | 5.74275E-19 | 30 | PSMD2/PSMD1/PSMC3/PSMC4/PSMC5/PSMC1/PSMC2/PSMD13/PSMC6/PSMD12/PSMA2/PSMD7/PSMD11/PSMB4/PSMD14/PSMB1/PSMB3/PSMA5/CLTC/PSMA7/PSMA1/PSMA4/PSMB7/PSMD8/PSMD4/PSMA6/PSMA3/PSMB2/PSME3/PSMB6                                                                                                                                                            |
| GO:0090175 | regulation of establishment of planar polarity                  | 1.03692E-18 | 30 | PSMD2/PSMD1/PSMC3/PSMC4/PSMC5/PSMC1/PSMC2/PSMD13/PSMC6/PSMD12/PSMA2/PSMD7/PSMD11/PSMB4/PSMD14/PSMB1/PSMB3/PSMA5/CLTC/PSMA7/PSMA1/PSMA4/PSMB7/PSMD8/PSMD4/PSMA6/PSMA3/PSMB2/PSME3/PSMB6                                                                                                                                                            |
| GO:0000956 | nuclear-transcribed mRNA catabolic process                      | 1.20335E-18 | 39 | TNRC6B/RPSA/PABPC1/RPL3/PPP2R1A/RPL6/RPS4X/RPL23/THRAP3/RPS8/RPS18/RPL21/RPS15/RPL5/RPL10/RPS5/RPS3A/RPS19/RPL8/RPL27/RPL15/RPL12/RPL14/RPS13/RPL24/RPL11/RPS28/RPS25/RPS26/RPL10A/RPS23/RPL36/CNOT1/RPS9/RPL28/RPL23A/RPL35/RPL30/RPS29                                                                                                          |
| GO:0062012 | regulation of small molecule metabolic process                  | 3.52555E-18 | 56 | VCP/PSMD2/KPNB1/PSMD1/PSMC3/PSMC4/FASN/PSMC5/PSMC1/PSMC2/NUP188/PSMD13/NUP160/PSMC6/PSMD12/ERLIN2/RANBP2/PSMA2/PSMD7/PSMD11/PSMB4/PSMD14/ERLIN1/PSMB1/NUP93/PFKFB3/CYP51A1/DDB1/PSMB3/PSMA5/CLTC/PSMA7/PSMA1/PSMA4/PSMB7/PSMD8/DHCR7/PSMD4/NUP210/PSMA6/PSMA3/FDFT1/PSMB2/CDK1/PSME3/PPP1CA/ZMPSTE24/PSMB6/RAN/NUP37/OGT/SCD/CAV1/SQLE/RAE1/FAM3A |
| GO:0071347 | cellular response to interleukin-1                              | 5.01711E-18 | 36 | PSMD2/OTUD4/PSMD1/PSMC3/PSMC4/PSMC5/PSMC1/PSMC2/PSMD13/PSMC6/PSMD12/MAP3K7/PSMA2/PSMD7/PSMD11/PSMB4/PSMD14/PSMB1/PSMB3/TAB2/SQSTM1/TAB3/PSMA5/PSMA7/PSMA1/PSMA4/PSMB7/PSMD8/PSMD4/PSMA6/PSMA3/PSMB2/PSME3/PSMB6/SKP1/AKAP12                                                                                                                       |

|            |                                           |             |    |                                                                                                                                                                                                                                                                                                |
|------------|-------------------------------------------|-------------|----|------------------------------------------------------------------------------------------------------------------------------------------------------------------------------------------------------------------------------------------------------------------------------------------------|
| GO:0000086 | G2/M transition of mitotic cell cycle     | 1.44519E-17 | 41 | PSMD2/PSMD1/PSMC3/PSMC4/PSMC5/PSMC1/PSMC2/HSP90AA1/PSMD13/PSMC6/PSMD12/PSMA2/PSMD7/PSMD11/PSMB4/PSMD14/PSMB1/CEP250/PSMB3/CKAP5/PPP2R1A/PSMA5/PSMA7/PSMA1/PSMA4/PSMB7/PSMD8/PSMD4/ACTR1A/PSMA6/PSMA3/PSMB2/CDK1/PSME3/PSMB6/DYNC112/SKP1/PRKACA/NDE1/DCTN2/PLK1                                |
| GO:0001738 | morphogenesis of a polarized epithelium   | 1.90806E-17 | 32 | PSMD2/PSMD1/PSMC3/PSMC4/PSMC5/PSMC1/PSMC2/PSMD13/PSMC6/PSMD12/PSMA2/PSMD7/PSMD11/PSMB4/PSMD14/PSMB1/PSMB3/PSMA5/CLTC/PSMA7/PSMA1/PSMA4/PSMB7/PSMD8/PSMD4/PSMA6/PSMA3/PSMB2/CAMSAP3/PSME3/PSMB6/RAB10                                                                                           |
| GO:0044839 | cell cycle G2/M phase transition          | 3.3517E-17  | 42 | PSMD2/PSMD1/PSMC3/PSMC4/PSMC5/PSMC1/PSMC2/HSP90AA1/PSMD13/PSMC6/PSMD12/PSMA2/PSMD7/PSMD11/PSMB4/PSMD14/PSMB1/CEP250/PSMB3/CKAP5/PPP2R1A/PSMA5/PSMA7/PSMA1/AKAP8L/PSMA4/PSMB7/PSMD8/PSMD4/ACTR1A/PSMA6/PSMA3/PSMB2/CDK1/PSME3/PSMB6/DYNC112/SKP1/PRKACA/NDE1/DCTN2/PLK1                         |
| GO:0001736 | establishment of planar polarity          | 4.57798E-17 | 30 | PSMD2/PSMD1/PSMC3/PSMC4/PSMC5/PSMC1/PSMC2/PSMD13/PSMC6/PSMD12/PSMA2/PSMD7/PSMD11/PSMB4/PSMD14/PSMB1/PSMB3/PSMA5/CLTC/PSMA7/PSMA1/PSMA4/PSMB7/PSMD8/PSMD4/PSMA6/PSMA3/PSMB2/PSME3/PSMB6                                                                                                         |
| GO:0007164 | establishment of tissue polarity          | 4.57798E-17 | 30 | PSMD2/PSMD1/PSMC3/PSMC4/PSMC5/PSMC1/PSMC2/PSMD13/PSMC6/PSMD12/PSMA2/PSMD7/PSMD11/PSMB4/PSMD14/PSMB1/PSMB3/PSMA5/CLTC/PSMA7/PSMA1/PSMA4/PSMB7/PSMD8/PSMD4/PSMA6/PSMA3/PSMB2/PSME3/PSMB6                                                                                                         |
| GO:0035567 | non-canonical Wnt signaling pathway       | 1.4175E-16  | 32 | PSMD2/PSMD1/PSMC3/PSMC4/PSMC5/PSMC1/PSMC2/PSMD13/PSMC6/PSMD12/PSMA2/PSMD7/PSMD11/PSMB4/PSMD14/PSMB1/PSMB3/PSMA5/CLTC/PSMA7/PSMA1/PSMA4/PSMB7/PSMD8/PSMD4/PSMA6/PSMA3/PSMB2/PSME3/PSMB6                                                                                                         |
| GO:0010948 | negative regulation of cell cycle process | 5.55966E-16 | 47 | PRKDC/PSMD2/PSMD1/PSMC3/HSP90AB1/PSMC4/PSMC5/PSMC1/PSMC2/PSMD13/PSMC6/PSMD12/MSH6/PSMA2/PSMD7/PSMD11/PSMB4/PSMD14/MGA/PSMB1/PSMB3/ZW10/PSMA5/PSMA7/PSMA1/PSMA4/CALR/RPL23/PSMB7/PSMD8/PSMD4/PSMA6/PSMA3/PSMB2/PRKAR1A/CDK1/PSME3/TRIP13/PSMB6/SKP1/PRMT1/RPS27L/L3MBTL2/TFDP1/CNOT1/PCGF6/PLK1 |
| GO:0038095 | Fc-epsilon receptor signaling pathway     | 6.60743E-16 | 33 | PSMD2/PSMD1/PSMC3/PSMC4/PSMC5/PSMC1/PSMC2/PSMD13/PSMC6/PSMD12/PSMA2/PSMD7/PSMD11/PSMB4/PSMD14/PSMB1/PSMB3/TAB2/TAB3/PSMA5/PSMA7/PSMA1/PSMA4/PSMB7/PSMD8/PSMD4/PSMA6/PSMA3/PSMB2/PSME3/PSMB6/SKP1                                                                                               |
| GO:0070555 | response to interleukin-1                 | 8.13247E-16 | 36 | PSMD2/OTUD4/PSMD1/PSMC3/PSMC4/PSMC5/PSMC1/PSMC2/PSMD13/PSMC6/PSMD12/PSMA2/PSMD7/PSMD11/PSMB4/PSMD14/PSMB1/PSMB3/TAB2/SQSTM1/TAB3/PSMA5/PSMA7/PSMA1/PSMA4/PSMB7/PSMD8/PSMD4/PSMA6/PSMA3/PSMB2/PSME3/PSMB6/SKP1/AKAP12                                                                           |

|            |                                                            |             |    |                                                                                                                                                                                                                                                                                                                                                       |
|------------|------------------------------------------------------------|-------------|----|-------------------------------------------------------------------------------------------------------------------------------------------------------------------------------------------------------------------------------------------------------------------------------------------------------------------------------------------------------|
| GO:0038061 | NIK/NF-kappaB signaling                                    | 9.61652E-16 | 34 | PSMD2/PSMD1/PSMC3/PSMC4/PSMC5/PSMC1/PSMC2/PSMD13/PSMC6/PSMD12/MAP3K7/PSMA2/PSMD7/PSMD11/PSMB4/PSMD14/PSMB1/PSMB3/PSMA5/PPM1B/PSMA7/PSMA1/PSMA4/CALR/PSMB7/PSMD8/PSMD4/PSMA6/PSMA3/PRDX1/PSMB2/PSME3/PSMB6/SKP1                                                                                                                                        |
| GO:1901991 | negative regulation of mitotic cell cycle phase transition | 9.89406E-16 | 39 | PRKDC/PSMD2/PSMD1/PSMC3/PSMC4/PSMC5/PSMC1/PSMC2/PSMD13/PSMC6/PSMD12/PSMA2/PSMD7/PSMD11/PSMB4/PSMD14/PSMB1/PSMB3/ZW10/PSMA5/PSMA7/PSMA1/PSMA4/PSMB7/PSMD8/PSMD4/PSMA6/PSMA3/PSMB2/CDK1/PSME3/TRIP13/PSMB6/SKP1/PRMT1/RPS27L/TFDP1/CNOT1/P LK1                                                                                                          |
| GO:0044106 | cellular amine metabolic process                           | 1.80834E-15 | 29 | PSMD2/PSMD1/PSMC3/PSMC4/PSMC5/PSMC1/PSMC2/PSMD13/PSMC6/PSMD12/PSMA2/PSMD7/PSMD11/PSMB4/PSMD14/PSMB1/PSMB3/PSMA5/PSMA7/PSMA1/PSMA4/PSMB7/PSMD8/PSMD4/PSMA6/PSMA3/PSMB2/PSME3/PSMB6                                                                                                                                                                     |
| GO:0050852 | T cell receptor signaling pathway                          | 2.95119E-15 | 35 | PSMD2/PSMD1/PSMC3/PSMC4/PSMC5/PSMC1/PSMC2/PSMD13/PSMC6/PSMD12/MAP3K7/PSMA2/PSMD7/PSMD11/PSMB4/PSMD14/STOML2/PSMB1/PSMB3/TAB2/PSMA5/PSMA7/PSMA1/PSMA4/PSMB7/PSMD8/PSMD4/PSMA6/PSMA3/PSMB2/PSME3/PSMB6/SKP1/EIF2B3/EIF2B5                                                                                                                               |
| GO:0002244 | hematopoietic progenitor cell differentiation              | 3.53605E-15 | 32 | PRKDC/PSMD2/PSMD1/PSMC3/PSMC4/PSMC5/PSMC1/PSMC2/PSMD13/PSMC6/PSMD12/EEF2/PSMA2/PSMD7/PSMD11/PSMB4/PSMD14/PSMB1/PSMB3/PSMA5/PSMA7/PSMA1/PSMA4/ZBTB24/PSMB7/PSMD8/PSMD4/PSMA6/PSMA3/PSMB2/PSME3/PSMB6                                                                                                                                                   |
| GO:0071453 | cellular response to oxygen levels                         | 7.00472E-15 | 37 | PSMD2/PSMD1/PSMC3/PSMC4/PSMC5/PSMC1/PSMC2/PSMD13/PSMC6/PSMD12/PSMA2/PSMD7/PSMD11/PSMB4/PSMD14/PSMB1/OPA1/PSMB3/PSMA5/PSMA7/PSMA1/ATP6AP1/PSMA4/PSMB7/PSMD8/NAMPT/PSMD4/AIFM1/PSMA6/PSMA3/PSMB2/PSME3/ELOC/PSMB6/STUB1/ATP6V1A/CAV1                                                                                                                    |
| GO:0008380 | RNA splicing                                               | 7.74678E-15 | 52 | PRMT5/PRPF31/WDR77/SNRNP200/HNRNPK/DDX20/CLNS1A/PRPF8/GEMIN4/SF3B1/EFTUD2/HNRNPF/HNRNPU/IVNS1ABP/SF3B3/PABPC1/PPP2R1A/AKAP8L/STRAP/HNRNPM/NONO/THRAP3/PCBP1/PCBP2/HNRNPL/AAR2/PRDX6/SMN1/SNRPD2/SF3B2/SNRPB/HNRNPA1/DHX9/SNRNP70/HNRNPA0/SNRPD3/SNRPA1/GEMIN5/PTBP1/RPS13/TARDBP/RPS26/GEMIN6/SF3B6/DHX15/HNRNPD/NSRP1/SNRPF/THOC3/SNRPG/SNRPE/PABPN1 |
| GO:0009308 | amine metabolic process                                    | 1.30058E-14 | 29 | PSMD2/PSMD1/PSMC3/PSMC4/PSMC5/PSMC1/PSMC2/PSMD13/PSMC6/PSMD12/PSMA2/PSMD7/PSMD11/PSMB4/PSMD14/PSMB1/PSMB3/PSMA5/PSMA7/PSMA1/PSMA4/PSMB7/PSMD8/PSMD4/PSMA6/PSMA3/PSMB2/PSME3/PSMB6                                                                                                                                                                     |
| GO:1901988 | negative regulation of cell cycle phase transition         | 1.39922E-14 | 39 | PRKDC/PSMD2/PSMD1/PSMC3/PSMC4/PSMC5/PSMC1/PSMC2/PSMD13/PSMC6/PSMD12/PSMA2/PSMD7/PSMD11/PSMB4/PSMD14/PSMB1/PSMB3/ZW10/PSMA5/PSMA7/PSMA1/PSMA4/PSMB7/PSMD8/PSMD4/PSMA6/PSMA3/PSMB2/CDK1/PSME3/TRIP13/PSMB6/SKP1/PRMT1/RPS27L/TFDP1/CNOT1/P LK1                                                                                                          |

|            |                                                   |             |    |                                                                                                                                                                                                                                                                                                                       |
|------------|---------------------------------------------------|-------------|----|-----------------------------------------------------------------------------------------------------------------------------------------------------------------------------------------------------------------------------------------------------------------------------------------------------------------------|
| GO:0006913 | nucleocytoplasmic transport                       | 1.50576E-14 | 44 | IPO8/XPO1/IPO5/KPNB1/FLNA/XPOT/CSE1L/NUP188/NUP160/DDX20/TRIM28/RANBP2/GEMIN4/NUP93/EMD/RANBP6/AKAP8L/NF1/UBR5/CALR/RPL23/RANGAP1/RPS15/NUP210/SMN1/SNRPD2/SNRPB/HNRNPA1/DHX9/CHP1/RAN/SNRPD3/GEMIN5/PRKACA/NUP37/TARDBP/GEMIN6/SNRPF/RAE1/THOC3/TXN/SNRPG/SNRPE/PABPN1                                               |
| GO:0016579 | protein deubiquitination                          | 1.68612E-14 | 40 | VCP/PSMD2/OTUD4/PSMD1/PSMC3/PSMC4/PSMC5/PSMC1/PSMC2/PSMD13/PSMC6/PSMD12/MAP3K7/USP15/PSMA2/PSMD7/PSMD11/PSMB4/PSMD14/RAD23B/PSMB1/PSMB3/PSMA5/PSMA7/PSMA1/USP9X/PSMA4/PSMB7/PSMD8/PSMD4/PSMA6/PSMA3/UFD1/EIF3F/PSMB2/CDK1/ADRM1/PSME3/PSMB6/OGT                                                                       |
| GO:1901990 | regulation of mitotic cell cycle phase transition | 1.89465E-14 | 50 | PRKDC/PSMD2/PSMD1/PSMC3/PSMC4/PSMC5/PSMC1/PSMC2/HSP90AA1/PSMD13/PSMC6/PSMD12/PSMA2/PSMD7/PSMD11/PSMB4/PSMD14/PSMB1/CEP250/DDB1/PSMB3/ZW10/CKAP5/PPP2R1A/PSMA5/PSMA7/PSMA1/PSMA4/PSMB7/PSMD8/PSMD4/ACTR1A/PSMA6/PSMA3/DDX3X/PSMB2/CDK1/PSME3/TRIP13/PSMB6/DYNC112/SKP1/PRKACA/NDE1/PRMT1/DCTN2/RPS27L/TFDP1/CNOT1/PLK1 |
| GO:0051169 | nuclear transport                                 | 2.10589E-14 | 44 | IPO8/XPO1/IPO5/KPNB1/FLNA/XPOT/CSE1L/NUP188/NUP160/DDX20/TRIM28/RANBP2/GEMIN4/NUP93/EMD/RANBP6/AKAP8L/NF1/UBR5/CALR/RPL23/RANGAP1/RPS15/NUP210/SMN1/SNRPD2/SNRPB/HNRNPA1/DHX9/CHP1/RAN/SNRPD3/GEMIN5/PRKACA/NUP37/TARDBP/GEMIN6/SNRPF/RAE1/THOC3/TXN/SNRPG/SNRPE/PABPN1                                               |
| GO:0002181 | cytoplasmic translation                           | 3.29272E-14 | 25 | EIF4B/EIF3B/EEF2/EIF3A/RPSA/RPL6/EIF3I/EIF3M/EIF3F/DHX9/EIF2S3/RPL8/EIF3H/RPL15/RPL24/RPL11/RPS28/RPS26/EIF3G/RPL10A/RPS23/RPL36/EIF5/RPL30/RPS29                                                                                                                                                                     |
| GO:0002218 | activation of innate immune response              | 3.42347E-14 | 42 | PRKDC/PSMD2/OTUD4/PSMD1/PSMC3/PSMC4/PSMC5/PSMC1/PSMC2/PSMD13/PSMC6/PSMD12/NPLOC4/MAP3K7/PSMA2/PSMD7/PSMD11/PSMB4/PSMD14/PSMB1/HSP90B1/PSMB3/TAB2/TAB3/PSMA5/PSMA7/PSMA1/PSMA4/NONO/PSMB7/PSMD8/PSMD4/PSMA6/PSMA3/UFD1/PSMB2/PSME3/MATR3/PSMB6/SKP1/PRKACA/CAV1                                                        |
| GO:0010565 | regulation of cellular ketone metabolic process   | 5.1522E-14  | 32 | PSMD2/PSMD1/PSMC3/PSMC4/PSMC5/PSMC1/PSMC2/PSMD13/PSMC6/PSMD12/ERLIN2/PSMA2/PSMD7/PSMD11/PSMB4/PSMD14/ERLIN1/PSMB1/PSMB3/PSMA5/PSMA7/PSMA1/PSMA4/PSMB7/PSMD8/PSMD4/PSMA6/PSMA3/PSMB2/PSME3/PSMB6/CAV1                                                                                                                  |
| GO:0070646 | protein modification by small protein removal     | 1.20852E-13 | 40 | VCP/PSMD2/OTUD4/PSMD1/PSMC3/PSMC4/PSMC5/PSMC1/PSMC2/PSMD13/PSMC6/PSMD12/MAP3K7/USP15/PSMA2/PSMD7/PSMD11/PSMB4/PSMD14/RAD23B/PSMB1/PSMB3/PSMA5/PSMA7/PSMA1/USP9X/PSMA4/PSMB7/PSMD8/PSMD4/PSMA6/PSMA3/UFD1/EIF3F/PSMB2/CDK1/ADRM1/PSME3/PSMB6/OGT                                                                       |

|            |                                                        |             |    |                                                                                                                                                                                                                                                                                                                       |
|------------|--------------------------------------------------------|-------------|----|-----------------------------------------------------------------------------------------------------------------------------------------------------------------------------------------------------------------------------------------------------------------------------------------------------------------------|
| GO:0038093 | Fc receptor signaling pathway                          | 1.35782E-13 | 36 | PSMD2/PSMD1/PSMC3/HSP90AB1/PSMC4/PSMC5/PSMC1/PSMC2/HSP90AA1/PSMD13/PSMC6/PSMD12/MAP3K7/PSMA2/PSMD7/PSMD11/PSMB4/PSMD14/PSMB1/PSMB3/TAB2/TAB3/PSMA5/PSMA7/PSMA1/PSMA4/PSMB7/PSMD8/PSMD4/PSMA6/PSMA3/ELMO2/PSMB2/PSME3/PSMB6/SKP1                                                                                       |
| GO:0034976 | response to endoplasmic reticulum stress               | 1.38849E-13 | 39 | VCP/HSPA5/ATP2A2/CANX/BAG6/FAF2/PSMC6/ECPAS/NPLOC4/ERLIN2/EEF2/ERLIN1/OPA1/HSP90B1/UBAC2/RACK1/STT3B/GET4/CALR/CCDC47/AIFM1/AMFR/CLGN/AUP1/HM13/UFD1/PDIA3/SRPRB/TMEM33/SSR1/CLU/TARDBP/STUB1/TMCO1/CAV1/DERL1/TMTC3/EIF2B5/SEC61B                                                                                    |
| GO:0045089 | positive regulation of innate immune response          | 1.54449E-13 | 45 | PRKDC/PSMD2/OTUD4/PSMD1/PSMC3/PSMC4/PSMC5/PSMC1/PSMC2/PSMD13/PSMC6/PSMD12/NPLOC4/MAP3K7/PSMA2/PSMD7/PSMD11/PSMB4/PSMD14/PSMB1/HSP90B1/PSMB3/TAB2/TAB3/PSMA5/PSMA7/PSMA1/PSMA4/NONO/PSMB7/PSMD8/PLSCR1/PSMD4/PSMA6/PSMA3/UFD1/PSMB2/DHX9/RPS19/PSME3/MATR3/PSMB6/SKP1/PRKACA/CAV1                                      |
| GO:0036294 | cellular response to decreased oxygen levels           | 2.34391E-13 | 34 | PSMD2/PSMD1/PSMC3/PSMC4/PSMC5/PSMC1/PSMC2/PSMD13/PSMC6/PSMD12/PSMA2/PSMD7/PSMD11/PSMB4/PSMD14/PSMB1/OPA1/PSMB3/PSMA5/PSMA7/PSMA1/PSMA4/PSMB7/PSMD8/NAMPT/PSMD4/AIFM1/PSMA6/PSMA3/PSMB2/PSME3/ELOC/PSMB6/STUB1                                                                                                         |
| GO:0090090 | negative regulation of canonical Wnt signaling pathway | 2.60552E-13 | 31 | PSMD2/PSMD1/PSMC3/PSMC4/PSMC5/PSMC1/PSMC2/PSMD13/PSMC6/PSMD12/PSMA2/PSMD7/PSMD11/PSMB4/PSMD14/PSMB1/EMD/PSMB3/PSMA5/PSMA7/PSMA1/PSMA4/PSMB7/PSMD8/PSMD4/PSMA6/PSMA3/PSMB2/PSME3/PSMB6/CAV1                                                                                                                            |
| GO:0033209 | tumor necrosis factor-mediated signaling pathway       | 3.41444E-13 | 30 | PSMD2/PSMD1/PSMC3/PSMC4/PSMC5/PSMC1/PSMC2/PSMD13/PSMC6/PSMD12/PSMA2/PSMD7/PSMD11/PSMB4/PSMD14/PSMB1/PSMB3/PSMA5/RACK1/PSMA7/PSMA1/PSMA4/PSMB7/PSMD8/PSMD4/PSMA6/PSMA3/PSMB2/PSME3/PSMB6                                                                                                                               |
| GO:1901987 | regulation of cell cycle phase transition              | 4.86463E-13 | 50 | PRKDC/PSMD2/PSMD1/PSMC3/PSMC4/PSMC5/PSMC1/PSMC2/HSP90AA1/PSMD13/PSMC6/PSMD12/PSMA2/PSMD7/PSMD11/PSMB4/PSMD14/PSMB1/CEP250/DDB1/PSMB3/ZW10/CKAP5/PPP2R1A/PSMA5/PSMA7/PSMA1/PSMA4/PSMB7/PSMD8/PSMD4/ACTR1A/PSMA6/PSMA3/DDX3X/PSMB2/CDK1/PSME3/TRIP13/PSMB6/DYNC112/SKP1/PRKACA/NDE1/PRMT1/DCTN2/RPS27L/TFDP1/CNOT1/PLK1 |
| GO:0043687 | post-translational protein modification                | 5.84123E-13 | 43 | PSMD2/PSMD1/PSMC3/PSMC4/PSMC5/PSMC1/PSMC2/PSMD13/PSMC6/PSMD12/PSMA2/PSMD7/PSMD11/PSMB4/PSMD14/PSMB1/HSP90B1/DDB1/PSMB3/PSMA5/PSMA7/PSMA1/STT3B/PSMA4/PSMB7/PSMD8/PSMD4/PSMA6/PSMA3/RCN1/FBXW5/PSMB2/PSME3/ELOC/CKAP4/PSMB6/SKP1/APLP2/CALU/P3H1/CRTAP/CCDC8/CCN1                                                      |
| GO:0002758 | innate immune response-activating signal transduction  | 6.50291E-13 | 39 | PSMD2/OTUD4/PSMD1/PSMC3/PSMC4/PSMC5/PSMC1/PSMC2/PSMD13/PSMC6/PSMD12/NPLOC4/MAP3K7/PSMA2/PSMD7/PSMD11/PSMB4/PSMD14/PSMB1/HSP90B1/PSMB3/TAB2/TAB3/PSMA5/PSMA7/PSMA1/PSMA4/PSMB7/PSMD8/PSMD4/PSMA6/PSMA3/UFD1/PSMB2/PSME3/PSMB6/SKP1/PRKACA/CAV1                                                                         |

|            |                                                                                      |             |    |                                                                                                                                                                                                                                                                                                      |
|------------|--------------------------------------------------------------------------------------|-------------|----|------------------------------------------------------------------------------------------------------------------------------------------------------------------------------------------------------------------------------------------------------------------------------------------------------|
| GO:0000377 | RNA splicing, via transesterification reactions with bulged adenosine as nucleophile | 6.69696E-13 | 44 | PRMT5/PRPF31/WDR77/SNRNP200/HNRNPK/DDX20/CLNS1A/PRPF8/GEMIN4/SF3B1/EFTUD2/HNRNPF/HNRNPU/SF3B3/PABPC1/STRAP/HNRNPM/THRAP3/PCBP1/PCBP2/HNRNPL/AAR2/PRDX6/SMN1/SNRPD2/SF3B2/SNRPB/HNRNPA1/DHX9/SNRNP70/HNRNPA0/SNRPD3/SNRPA1/GEMIN5/PTBP1/GEMIN6/SF3B6/DHX15/HNRNPD/NSRP1/SNRPF/SNRPG/SNRPE/PABPN1      |
| GO:0000398 | mRNA splicing, via spliceosome                                                       | 6.69696E-13 | 44 | PRMT5/PRPF31/WDR77/SNRNP200/HNRNPK/DDX20/CLNS1A/PRPF8/GEMIN4/SF3B1/EFTUD2/HNRNPF/HNRNPU/SF3B3/PABPC1/STRAP/HNRNPM/THRAP3/PCBP1/PCBP2/HNRNPL/AAR2/PRDX6/SMN1/SNRPD2/SF3B2/SNRPB/HNRNPA1/DHX9/SNRNP70/HNRNPA0/SNRPD3/SNRPA1/GEMIN5/PTBP1/GEMIN6/SF3B6/DHX15/HNRNPD/NSRP1/SNRPF/SNRPG/SNRPE/PABPN1      |
| GO:0000375 | RNA splicing, via transesterification reactions                                      | 8.99005E-13 | 44 | PRMT5/PRPF31/WDR77/SNRNP200/HNRNPK/DDX20/CLNS1A/PRPF8/GEMIN4/SF3B1/EFTUD2/HNRNPF/HNRNPU/SF3B3/PABPC1/STRAP/HNRNPM/THRAP3/PCBP1/PCBP2/HNRNPL/AAR2/PRDX6/SMN1/SNRPD2/SF3B2/SNRPB/HNRNPA1/DHX9/SNRNP70/HNRNPA0/SNRPD3/SNRPA1/GEMIN5/PTBP1/GEMIN6/SF3B6/DHX15/HNRNPD/NSRP1/SNRPF/SNRPG/SNRPE/PABPN1      |
| GO:0045088 | regulation of innate immune response                                                 | 9.56499E-13 | 48 | PRKDC/PSMD2/OTUD4/PSMD1/PSMC3/HSP90AB1/PSMC4/PSMC5/PSMC1/PSMC2/PSMD13/PSMC6/PSMD12/NPLOC4/MAP3K7/PSMA2/PSMD7/PSMD11/PSMB4/PSMD14/PSMB1/HSP90B1/PSMB3/TAB2/TAB3/PSMA5/PSMA7/PSMA1/PSMA4/NONO/PSMB7/PSMD8/PLSCR1/PSMD4/JAK1/PSMA6/PSMA3/UFD1/PSMB2/DHX9/RPS19/PSME3/MATR3/PSMB6/SKP1/PRKACA/CAV1/FAM3A |
| GO:1905330 | regulation of morphogenesis of an epithelium                                         | 2.8998E-12  | 30 | PSMD2/PSMD1/PSMC3/PSMC4/PSMC5/PSMC1/PSMC2/PSMD13/PSMC6/PSMD12/PSMA2/PSMD7/PSMD11/PSMB4/PSMD14/PSMB1/PSMB3/PSMA5/CLTC/PSMA7/PSMA1/PSMA4/PSMB7/PSMD8/PSMD4/PSMA6/PSMA3/PSMB2/PSME3/PSMB6                                                                                                               |
| GO:0071456 | cellular response to hypoxia                                                         | 2.92239E-12 | 32 | PSMD2/PSMD1/PSMC3/PSMC4/PSMC5/PSMC1/PSMC2/PSMD13/PSMC6/PSMD12/PSMA2/PSMD7/PSMD11/PSMB4/PSMD14/PSMB1/OPA1/PSMB3/PSMA5/PSMA7/PSMA1/PSMA4/PSMB7/PSMD8/PSMD4/PSMA6/PSMA3/PSMB2/PSME3/ELOC/PSMB6/STUB1                                                                                                    |
| GO:0000387 | spliceosomal snRNP assembly                                                          | 3.31946E-12 | 18 | PRMT5/PRPF31/WDR77/DDX20/CLNS1A/PRPF8/GEMIN4/STRAP/AAR2/SMN1/SNRPD2/SNRPB/SNRPD3/GEMIN5/GEMIN6/SNRPF/SNRPG/SNRPE                                                                                                                                                                                     |
| GO:0030178 | negative regulation of Wnt signaling pathway                                         | 4.46651E-12 | 32 | PSMD2/PSMD1/PSMC3/PSMC4/PSMC5/PSMC1/PSMC2/PSMD13/PSMC6/PSMD12/PSMA2/PSMD7/PSMD11/PSMB4/PSMD14/PSMB1/EMD/PSMB3/PSMA5/RACK1/PSMA7/PSMA1/PSMA4/PSMB7/PSMD8/PSMD4/PSMA6/PSMA3/PSMB2/PSME3/PSMB6/CAV1                                                                                                     |



|            |                                                             |             |    |                                                                                                                                                                                                                                                                          |
|------------|-------------------------------------------------------------|-------------|----|--------------------------------------------------------------------------------------------------------------------------------------------------------------------------------------------------------------------------------------------------------------------------|
| GO:0045930 | negative regulation of mitotic cell cycle                   | 8.67581E-12 | 40 | PRKDC/PSMD2/PSMD1/PSMC3/PSMC4/PSMC5/PSMC1/PSMC2/PSMD13/PSMC6/PSMD12/PSMA2/PSMD7/PSMD11/PSMB4/PSMD14/PSMB1/PSMB3/ZW10/PSMA5/PSMA7/PSMA1/PSMA4/PSMB7/PSMD8/PSMD4/PSMA6/PSMA3/PSMB2/CDK1/PSME3/TRIP13/PSMB6/SKP1/RPL24/PRMT1/RPS27L/TFDP1/CNOT1/PLK1                        |
| GO:0010499 | proteasomal ubiquitin-independent protein catabolic process | 9.4614E-12  | 13 | PSMA2/PSMB4/PSMB1/PSMB3/PSMA5/PSMA7/PSMA1/PSMA4/PSMB7/PSMA6/PSMA3/PSMB2/PSMB6                                                                                                                                                                                            |
| GO:0051170 | import into nucleus                                         | 1.21594E-11 | 28 | IPO8/IPO5/KPNB1/FLNA/CSE1L/NUP188/DDX20/TRIM28/RANBP2/GEMIN4/NUP93/RANBP6/NF1/UBR5/RPL23/SMN1/SNRPD2/SNRPB/HNRNPA1/CHP1/RAN/SNRPD3/GEMIN5/TARDBP/GEMIN6/SNRPF/SNRPG/SNRPE                                                                                                |
| GO:0070482 | response to oxygen levels                                   | 1.40312E-11 | 43 | PSMD2/PSMD1/PSMC3/PSMC4/PSMC5/PSMC1/PSMC2/PSMD13/PSMC6/PSMD12/PSMA2/PSMD7/PSMD11/PSMB4/PSMD14/PSMB1/OPA1/HSP90B1/PSMB3/PSMA5/PSMA7/PSMA1/ATP6AP1/NF1/PSMA4/PSMB7/PSMD8/NAMPT/PLOD1/PSMD4/SCFD1/AIFM1/PSMA6/PSMA3/PSMB2/PSME3/ELOC/PSMB6/STUB1/ATP6V1A/TM9SF4/SLC2A1/CAV1 |
| GO:0042180 | cellular ketone metabolic process                           | 1.45974E-11 | 34 | PSMD2/PSMD1/PSMC3/PSMC4/PSMC5/PSMC1/PSMC2/PSMD13/PSMC6/PSMD12/ERLIN2/NMT1/PSMA2/PSMD7/PSMD11/PSMB4/PSMD14/ERLIN1/PSMB1/PSMB3/PSMA5/PSMA7/PSMA1/PSMA4/PSMB7/PSMD8/PSMD4/NDUFA9/PSMA6/PSMA3/PSMB2/PSME3/PSMB6/CAV1                                                         |
| GO:0030111 | regulation of Wnt signaling pathway                         | 1.93961E-11 | 41 | VCP/PSMD2/PSMD1/PSMC3/PSMC4/PSMC5/PSMC1/PSMC2/PSMD13/PSMC6/PSMD12/PSMA2/PSMD7/PSMD11/PSMB4/PSMD14/PSMB1/SPIN1/EMD/PSMB3/PPP2R1A/PSMA5/RACK1/PSMA7/PSMA1/UBR5/PSMA4/ATP6AP2/PSMB7/PSMD8/PSMD4/PSMA6/PSMA3/DDX3X/PSMB2/PSME3/PPP1CA/PSMB6/CAV1/SMARCA4/WLS                 |
| GO:0060828 | regulation of canonical Wnt signaling pathway               | 3.33987E-11 | 36 | VCP/PSMD2/PSMD1/PSMC3/PSMC4/PSMC5/PSMC1/PSMC2/PSMD13/PSMC6/PSMD12/PSMA2/PSMD7/PSMD11/PSMB4/PSMD14/PSMB1/EMD/PSMB3/PSMA5/PSMA7/PSMA1/UBR5/PSMA4/PSMB7/PSMD8/PSMD4/PSMA6/PSMA3/DDX3X/PSMB2/PSME3/PPP1CA/PSMB6/CAV1/WLS                                                     |
| GO:0036293 | response to decreased oxygen levels                         | 3.7432E-11  | 41 | PSMD2/PSMD1/PSMC3/PSMC4/PSMC5/PSMC1/PSMC2/PSMD13/PSMC6/PSMD12/PSMA2/PSMD7/PSMD11/PSMB4/PSMD14/PSMB1/OPA1/HSP90B1/PSMB3/PSMA5/PSMA7/PSMA1/NF1/PSMA4/PSMB7/PSMD8/NAMPT/PLOD1/PSMD4/SCFD1/AIFM1/PSMA6/PSMA3/PSMB2/PSME3/ELOC/PSMB6/STUB1/TM9SF4/SLC2A1/CAV1                 |
| GO:0036503 | ERAD pathway                                                | 5.58E-11    | 22 | VCP/HSPA5/BAG6/FAF2/PSMC6/ECPAS/NPLOC4/ERLIN2/ERLIN1/HSP90B1/UBAC2/STT3B/GET4/CCDC47/AMFR/AUP1/HM13/UFD1/STUB1/CAV1/DERL1/SEC61B                                                                                                                                         |
| GO:0048863 | stem cell differentiation                                   | 2.53264E-10 | 33 | PSMD2/PSMD1/PSMC3/PSMC4/PSMC5/PSMC1/PSMC2/PSMD13/PSMC6/PSMD12/PSMA2/PSMD7/PSMD11/PSMB4/PSMD14/HNRNPU/PSMB1/PSMB3/PSMA5/PSMA7/PSMA1/PSMA4/PSMB7/PSMD8/PSMD4/PSMA6/PSMA3/PSMB2/PSME3/PSMB6/CFL1/CORO1C/SEMA3C                                                              |

|            |                                                                    |             |    |                                                                                                                                                                                                                                                                                |
|------------|--------------------------------------------------------------------|-------------|----|--------------------------------------------------------------------------------------------------------------------------------------------------------------------------------------------------------------------------------------------------------------------------------|
| GO:0001666 | response to hypoxia                                                | 3.27648E-10 | 39 | PSMD2/PSMD1/PSMC3/PSMC4/PSMC5/PSMC1/PSMC2/PSMD13/PSMC6/PSMD12/PSMA2/PSMD7/PSMD11/PSMB4/PSMD14/PSMB1/OPA1/HSP90B1/PSMB3/PSMA5/PSMA7/PSMA1/NF1/PSMA4/PSMB7/PSMD8/PLOD1/PSMD4/SCFD1/PSMA6/PSMA3/PSMB2/PSME3/ELOC/PSMB6/STUB1/TM9SF4/SLC2A1/CAV1                                   |
| GO:0010256 | endomembrane system organization                                   | 5.80092E-10 | 43 | PRMT5/ATP2A2/SPTBN1/MYH9/GOLGA2/BAG6/GCC2/TMEM43/NPLOC4/LMAN1/NUP93/EMD/ZW10/PPP2R1A/SQSTM1/AKAP8L/TMED10/GET4/PLSCR1/CCDC47/SUN2/ARL1/TOR1AIP1/SEC61A1/UBL4A/CDK1/CAMSAP3/LMAN2/TMEM33/ZMPSTE24/TMED9/CLU/RAB10/RTN3/TARDBP/STX18/TMED5/CAV1/ARHGAP21/CORO1C/RAB7A/TMED1/PLK1 |
| GO:0071356 | cellular response to tumor necrosis factor                         | 1.67336E-09 | 34 | PSMD2/PSMD1/PSMC3/PSMC4/PSMC5/PSMC1/PSMC2/PSMD13/PSMC6/PSMD12/PRPF8/PSMA2/PSMD7/PSMD11/PSMB4/PSMD14/PSMB1/PSMB3/PSMA5/RACK1/PSMA7/PSMA1/PSMA4/PSMB7/PSMD8/PSMD4/PSMA6/PSMA3/SMPD4/PSMB2/DHX9/PSME3/PSMB6/AKAP12                                                                |
| GO:0000209 | protein polyubiquitination                                         | 2.06924E-09 | 35 | HUWE1/PSMD2/PSMD1/PSMC3/PSMC4/PSMC5/PSMC1/PSMC2/PSMD13/PSMC6/PSMD12/PSMA2/PSMD7/PSMD11/PSMB4/PSMD14/PSMB1/PSMB3/PSMA5/PSMA7/PSMA1/UBR5/PSMA4/PSMB7/PSMD8/PSMD4/AMFR/PSMA6/PSMA3/FBXW5/PSMB2/PSME3/PSMB6/SKP1/STUB1                                                             |
| GO:0050851 | antigen receptor-mediated signaling pathway                        | 3.63148E-09 | 35 | PSMD2/PSMD1/PSMC3/PSMC4/PSMC5/PSMC1/PSMC2/PSMD13/PSMC6/PSMD12/MAP3K7/PSMA2/PSMD7/PSMD11/PSMB4/PSMD14/STOML2/PSMB1/PSMB3/TAB2/PSMA5/PSMA7/PSMA1/PSMA4/PSMB7/PSMD8/PSMD4/PSMA6/PSMA3/PSMB2/PSME3/PSMB6/SKP1/EIF2B3/EIF2B5                                                        |
| GO:0060070 | canonical Wnt signaling pathway                                    | 4.20633E-09 | 36 | VCP/PSMD2/PSMD1/PSMC3/PSMC4/PSMC5/PSMC1/PSMC2/PSMD13/PSMC6/PSMD12/PSMA2/PSMD7/PSMD11/PSMB4/PSMD14/PSMB1/EMD/PSMB3/PSMA5/PSMA7/PSMA1/UBR5/PSMA4/PSMB7/PSMD8/PSMD4/PSMA6/PSMA3/DDX3X/PSMB2/PSME3/PPP1CA/PSMB6/CAV1/WLS                                                           |
| GO:2000027 | regulation of animal organ morphogenesis                           | 5.21407E-09 | 31 | PSMD2/PSMD1/PSMC3/PSMC4/PSMC5/PSMC1/PSMC2/PSMD13/PSMC6/PSMD12/PSMA2/PSMD7/PSMD11/PSMB4/PSMD14/PSMB1/PSMB3/PSMA5/CLTC/PSMA7/PSMA1/PSMA4/PSMB7/PSMD8/PSMD4/PSMA6/PSMA3/PSMB2/PSME3/PSMB6/SEMA3C                                                                                  |
| GO:0030433 | ubiquitin-dependent ERAD pathway                                   | 5.87243E-09 | 18 | VCP/HSPA5/BAG6/FAF2/PSMC6/ECPAS/NPLOC4/ERLIN2/ERLIN1/HSP90B1/STT3B/CCDC47/AMFR/AUP1/STUB1/CAV1/DERL1/SEC61B                                                                                                                                                                    |
| GO:0034612 | response to tumor necrosis factor                                  | 1.22524E-08 | 34 | PSMD2/PSMD1/PSMC3/PSMC4/PSMC5/PSMC1/PSMC2/PSMD13/PSMC6/PSMD12/PRPF8/PSMA2/PSMD7/PSMD11/PSMB4/PSMD14/PSMB1/PSMB3/PSMA5/RACK1/PSMA7/PSMA1/PSMA4/PSMB7/PSMD8/PSMD4/PSMA6/PSMA3/SMPD4/PSMB2/DHX9/PSME3/PSMB6/AKAP12                                                                |
| GO:0002429 | immune response-activating cell surface receptor signaling pathway | 3.09609E-08 | 42 | PSMD2/PSMD1/PSMC3/HSP90AB1/BAG6/PSMC4/PSMC5/PSMC1/PSMC2/HSP90AA1/PSMD13/PSMC6/PSMD12/MAP3K7/PSMA2/PSMD7/PSMD11/PSMB4/PSMD14/STOML2/PSMB1/PSMB3/TAB2/TAB3/PSMA5/PSMA7/PSMA1/PSMA4/PSMB7/PSMD8/PLSCR1/PSMD4/PSMA6/PSMA3/ELMO2/PSMB2/PSME3/PSMB6/SKP1/PRKACA/EIF2B3/EIF2B5        |

|            |                                             |             |    |                                                                                                                                                                                                                             |
|------------|---------------------------------------------|-------------|----|-----------------------------------------------------------------------------------------------------------------------------------------------------------------------------------------------------------------------------|
| GO:0006457 | protein folding                             | 5.48967E-08 | 28 | VCP/HSPA5/CANX/HSP90AB1/TCP1/DNAJA2/PSMC1/DNAJC7/HSP90AA1/LMAN1/RANBP2/RAD23B/HSP90B1/CALR/DNAJB1/AMFR/CLGN/PDIA3/EMC2/SNRNP70/PRDX4/CLU/P3H1/MOGS/DERL1/CRTAP/PTGES3/EMC6                                                  |
| GO:0006520 | cellular amino acid metabolic process       | 5.62355E-08 | 36 | PSMD2/PSMD1/PSMC3/PSMC4/PSMC5/PSMC1/PSMC2/PSMD13/PSMC6/PSMD12/PHGDH/PSMA2/PSMD7/PSMD11/PSMB4/PSMD14/PSMB1/PSMB3/PSMA5/PSMA7/PSMA1/PSMA4/PSMB7/PSMD8/PLOD1/PSMD4/PSMA6/PSMA3/PSMB2/PSME3/AIMP1/PSMB6/GART/PRDX4/SLC1A3/CRTAP |
| GO:0042255 | ribosome assembly                           | 2.65631E-07 | 15 | RPSA/RPL3/RPL6/RPS15/DDX3X/RPL5/RPL10/RPS5/RPS19/RPL12/RPL24/RPL11/RPS28/RPS27L/RPL23A                                                                                                                                      |
| GO:0034504 | protein localization to nucleus             | 3.40519E-07 | 29 | IPO8/XPO1/IPO5/KPNB1/FLNA/TCP1/CSE1L/NUP188/TRIM28/RANBP2/HNRNPU/NUP93/RANBP6/NF1/UBR5/CALR/RPL23/RANGAP1/SUN2/TOR1AIP1/CDK1/OSBPL8/CHP1/SKP1/RAN/RPL11/TARDBP/TXN/PLK1                                                     |
| GO:0017038 | protein import                              | 4.61302E-07 | 25 | IPO8/IPO5/KPNB1/FLNA/CSE1L/NUP188/HSP90AA1/TRIM28/RANBP2/NUP93/TOMM40/RANBP6/NF1/UBR5/RPL23/TIMM50/TIMM23B/SAMM50/CHP1/RAN/AGK/CLU/TARDBP/NDUFA13/PEX3                                                                      |
| GO:0032527 | protein exit from endoplasmic reticulum     | 4.77639E-07 | 13 | VCP/GCC2/FAF2/NPLOC4/HSP90B1/UBAC2/AUP1/SAR1A/HM13/UFD1/TM9SF4/DERL1/SEC61B                                                                                                                                                 |
| GO:0042176 | regulation of protein catabolic process     | 7.18869E-07 | 35 | VCP/XPO1/PSMD2/FLNA/PSMD1/HSP90AB1/BAG6/PSMC4/PSMC1/PSMC2/HSP90AA1/PSMD14/RAD23B/CYP51A1/DDB1/SF3B3/UBAC2/RACK1/RPL23/RPL5/LPCAT1/PSME3/SEC22B/SNRNP70/PRKACA/CLU/OGT/RPL11/STUB1/NDUFA13/CAV1/RHBDD3/TMTC3/RAB7A/PLK1      |
| GO:0048193 | Golgi vesicle transport                     | 1.12979E-06 | 34 | VCP/SPTBN1/GOLGA2/GCC2/LMAN1/ZW10/RACK1/PPP6R1/TMED10/VPS13A/COPA/SCAMP3/SCFD1/ACTR1A/GOLGA3/ARL1/SAR1A/PPP6C/LMAN2/COPG1/SEC22B/DYNC1I2/ARCN1/ARF4/TMED9/CNIH4/RAB10/STX18/TMED5/EXOC4/KIF5A/DCTN2/CAPZA1/TMED1            |
| GO:0042254 | ribosome biogenesis                         | 1.52853E-06 | 30 | XPO1/HEATR1/MYBBP1A/GEMIN4/RPSA/RPL3/RPL6/RPS8/RPS15/DDX3X/RPL5/DDX21/RPL10/RPS5/BMS1/RPS19/RPL27/RAN/RPL12/RPL14/FBL/RPL24/RPL11/RPS28/RPS27L/RPL10A/NOM1/RPS9/RPL23A/RPL35                                                |
| GO:0006888 | ER to Golgi vesicle-mediated transport      | 1.79805E-06 | 25 | VCP/SPTBN1/GOLGA2/LMAN1/ZW10/PPP6R1/TMED10/COPA/SCFD1/ACTR1A/SAR1A/PPP6C/LMAN2/COPG1/SEC22B/DYNC1I2/ARCN1/ARF4/TMED9/CNIH4/STX18/TMED5/DCTN2/CAPZA1/TMED1                                                                   |
| GO:0044766 | multi-organism transport                    | 2.47147E-06 | 15 | XPO1/KPNB1/TCP1/NUP188/NUP160/RANBP2/NUP93/NUP210/RAN/NUP37/CAV1/DYNLT1/RAE1/RAB7A/THOC3                                                                                                                                    |
| GO:1902579 | multi-organism localization                 | 2.47147E-06 | 15 | XPO1/KPNB1/TCP1/NUP188/NUP160/RANBP2/NUP93/NUP210/RAN/NUP37/CAV1/DYNLT1/RAE1/RAB7A/THOC3                                                                                                                                    |
| GO:0019058 | viral life cycle                            | 4.01884E-06 | 31 | VCP/XPO1/KPNB1/HSP90AB1/NUP188/NUP160/TRIM28/RANBP2/STOM/NUP93/HACD3/RPSA/TFRC/DDB1/PABPC1/SLC1A5/PLSCR1/PCBP1/PCBP2/NUP210/ITGB1/PI4KA/ZC3HAV1/DDX3X/CDK1/RAN/NUP37/CAV1/DYNLT1/RAE1/RAB7A                                 |
| GO:0030970 | retrograde protein transport, ER to cytosol | 7.51847E-06 | 10 | VCP/FAF2/NPLOC4/HSP90B1/UBAC2/AUP1/HM13/UFD1/DERL1/SEC61B                                                                                                                                                                   |

|            |                                                         |             |    |                                                                                                                                                                                                                                             |
|------------|---------------------------------------------------------|-------------|----|---------------------------------------------------------------------------------------------------------------------------------------------------------------------------------------------------------------------------------------------|
| GO:1903513 | endoplasmic reticulum to cytosol transport              | 7.51847E-06 | 10 | VCP/FAF2/NPLOC4/HSP90B1/UBAC2/AUP1/HM13/UFD1/DERL1/SEC61B                                                                                                                                                                                   |
| GO:0051168 | nuclear export                                          | 8.03813E-06 | 23 | XPO1/XPOT/CSE1L/NUP188/NUP160/RANBP2/NUP93/EMD/AKAP8L/CALR/RANGAP1/RPS15/NUP210/HNRNPA1/DHX9/CHP1/RAN/PRKACA/NUP37/RAE1/THOC3/TXN/PABPN1                                                                                                    |
| GO:0001732 | formation of cytoplasmic translation initiation complex | 9.20188E-06 | 8  | EIF3B/EIF3A/EIF3I/EIF3M/EIF3F/EIF3H/EIF3G/EIF5                                                                                                                                                                                              |
| GO:0043312 | neutrophil degranulation                                | 1.1076E-05  | 38 | HUWE1/VCP/PSMD2/KPNB1/PSMD1/PSMC3/HSP90AB1/PSMC2/HSP90AA1/DDOST/FAF2/PSMD13/PSMD12/STOM/EEF2/PSMA2/PSMD7/PSMD11/PSMD14/UBR4/ATAD3B/PSMB1/PSMA5/DSP/ATP6AP2/PSMB7/PGRMC1/PRDX6/DX3X/IGF2R/LPCAT1/IMPDH2/CKAP4/PRDX4/RAB10/DYNLT1/RAB7A/MANBA |
| GO:0002283 | neutrophil activation involved in immune response       | 1.31228E-05 | 38 | HUWE1/VCP/PSMD2/KPNB1/PSMD1/PSMC3/HSP90AB1/PSMC2/HSP90AA1/DDOST/FAF2/PSMD13/PSMD12/STOM/EEF2/PSMA2/PSMD7/PSMD11/PSMD14/UBR4/ATAD3B/PSMB1/PSMA5/DSP/ATP6AP2/PSMB7/PGRMC1/PRDX6/DX3X/IGF2R/LPCAT1/IMPDH2/CKAP4/PRDX4/RAB10/DYNLT1/RAB7A/MANBA |
| GO:0042119 | neutrophil activation                                   | 2.28526E-05 | 38 | HUWE1/VCP/PSMD2/KPNB1/PSMD1/PSMC3/HSP90AB1/PSMC2/HSP90AA1/DDOST/FAF2/PSMD13/PSMD12/STOM/EEF2/PSMA2/PSMD7/PSMD11/PSMD14/UBR4/ATAD3B/PSMB1/PSMA5/DSP/ATP6AP2/PSMB7/PGRMC1/PRDX6/DX3X/IGF2R/LPCAT1/IMPDH2/CKAP4/PRDX4/RAB10/DYNLT1/RAB7A/MANBA |
| GO:0002446 | neutrophil mediated immunity                            | 2.41278E-05 | 38 | HUWE1/VCP/PSMD2/KPNB1/PSMD1/PSMC3/HSP90AB1/PSMC2/HSP90AA1/DDOST/FAF2/PSMD13/PSMD12/STOM/EEF2/PSMA2/PSMD7/PSMD11/PSMD14/UBR4/ATAD3B/PSMB1/PSMA5/DSP/ATP6AP2/PSMB7/PGRMC1/PRDX6/DX3X/IGF2R/LPCAT1/IMPDH2/CKAP4/PRDX4/RAB10/DYNLT1/RAB7A/MANBA |
| GO:0009408 | response to heat                                        | 3.58402E-05 | 21 | VCP/HSPA5/ATP2A2/HSP90AB1/DNAJA2/DNAJC7/NUP188/HSP90AA1/NUP160/RANBP2/NUP93/NF1/DNAJB1/NUP210/PRKACA/NUP37/STUB1/EIF2B3/RAE1/EIF2B5/PTGES3                                                                                                  |
| GO:0002183 | cytoplasmic translational initiation                    | 4.35612E-05 | 10 | EIF4B/EIF3B/EIF3A/EIF3I/EIF3M/EIF3F/EIF2S3/EIF3H/EIF3G/EIF5                                                                                                                                                                                 |
| GO:0006611 | protein export from nucleus                             | 4.84856E-05 | 21 | XPO1/XPOT/CSE1L/NUP188/NUP160/RANBP2/NUP93/EMD/AKAP8L/CALR/RANGAP1/RPS15/NUP210/CHP1/RAN/PRKACA/NUP37/RAE1/THOC3/TXN/PABPN1                                                                                                                 |
| GO:0034605 | cellular response to heat                               | 9.03757E-05 | 18 | VCP/HSPA5/ATP2A2/HSP90AB1/DNAJC7/NUP188/HSP90AA1/NUP160/RANBP2/NUP93/NF1/DNAJB1/NUP210/PRKACA/NUP37/STUB1/RAE1/PTGES3                                                                                                                       |
| GO:0019081 | viral translation                                       | 9.5669E-05  | 7  | EIF3B/EIF3A/PCBP2/EIF3F/DHX9/PTBP1/EIF3G                                                                                                                                                                                                    |
| GO:0033157 | regulation of intracellular protein transport           | 0.000137032 | 23 | HUWE1/XPO1/IPO5/FLNA/GCC2/LMAN1/TRIM28/STOM/EMD/UBAC2/AKAP8L/NF1/UBR5/HAX1/RANGAP1/SAR1A/CHP1/RAN/MFF/PRKACA/TARDBP/TM9SF4/TXN                                                                                                              |

|            |                                                                          |             |    |                                                                                                                                                                                                                        |
|------------|--------------------------------------------------------------------------|-------------|----|------------------------------------------------------------------------------------------------------------------------------------------------------------------------------------------------------------------------|
| GO:0046794 | transport of virus                                                       | 0.000175337 | 12 | XPO1/KPNB1/NUP188/NUP160/RANBP2/NUP93/NUP210/RAN/NUP37/CAV1/DYNLT1/RAE1                                                                                                                                                |
| GO:1903706 | regulation of hemopoiesis                                                | 0.000219514 | 35 | PSMD2/PSMD1/PSMC3/PSMC4/PSMC5/PSMC1/PSMC2/PSMD13/PSMC6/PSMD12/TNRC6B/PSMA2/PSMD7/PSMD11/PSMB4/PSMD14/PSMB1/CLPTM1/PSMB3/PSMA5/PSMA7/PSMA1/ATP6AP1/NF1/PSMA4/HAX1/PSMB7/PSMD8/PSMD4/PSMA6/PSMA3/PSMB2/PSME3/PSMB6/PRMT1 |
| GO:0034975 | protein folding in endoplasmic reticulum                                 | 0.000304111 | 7  | HSPA5/CANX/HSP90B1/CALR/PDIA3/EMC2/EMC6                                                                                                                                                                                |
| GO:0035966 | response to topologically incorrect protein                              | 0.000310601 | 21 | VCP/HSPA5/CANX/HSP90AB1/BAG6/HSP90AA1/FAF2/HSP90B1/RACK1/STT3B/CALR/DNAJB1/AMFR/CLGN/UFD1/SRPRB/TMEM33/SSR1/CLU/STUB1/DERL1                                                                                            |
| GO:0006998 | nuclear envelope organization                                            | 0.000345663 | 11 | TMEM43/NUP93/EMD/PPP2R1A/AKAP8L/SUN2/TOR1AIP1/CDK1/ZMPSTE24/TARDBP/PLK1                                                                                                                                                |
| GO:0046822 | regulation of nucleocytoplasmic transport                                | 0.000378051 | 15 | XPO1/IPO5/FLNA/TRIM28/EMD/AKAP8L/NF1/UBR5/RANGAP1/DHX9/CHP1/RAN/PRKACA/TARDBP/TXN                                                                                                                                      |
| GO:0009152 | purine ribonucleotide biosynthetic process                               | 0.000505927 | 25 | VCP/ATP5F1A/FASN/NUP188/NUP160/RANBP2/STOML2/NUP93/PFKFB3/SLC25A1/PDHB/HSD17B12/NUP210/IMP2H2/PPT1/NUP37/GART/OGT/CYC1/SCD/DLAT/ATP5F1D/PDHA1/ATP5PD/RAE1                                                              |
| GO:0007007 | inner mitochondrial membrane organization                                | 0.000646906 | 10 | IMMT/ATP5F1A/OPA1/DNAJC11/CHCHD3/SAMM50/AGK/ATP5F1D/NDUFA13/ATP5PD                                                                                                                                                     |
| GO:0006409 | tRNA export from nucleus                                                 | 0.000651581 | 9  | XPOT/NUP188/NUP160/RANBP2/NUP93/NUP210/RAN/NUP37/RAE1                                                                                                                                                                  |
| GO:0071431 | tRNA-containing ribonucleoprotein complex export from nucleus            | 0.000651581 | 9  | XPOT/NUP188/NUP160/RANBP2/NUP93/NUP210/RAN/NUP37/RAE1                                                                                                                                                                  |
| GO:0007029 | endoplasmic reticulum organization                                       | 0.000934794 | 11 | BAG6/LMAN1/GET4/CCDC47/SEC61A1/UBL4A/LMAN2/TMEM33/RAB10/RTN3/STX18                                                                                                                                                     |
| GO:0075733 | intracellular transport of virus                                         | 0.000934794 | 11 | XPO1/KPNB1/NUP188/NUP160/RANBP2/NUP93/NUP210/RAN/NUP37/DYNLT1/RAE1                                                                                                                                                     |
| GO:1903050 | regulation of proteolysis involved in cellular protein catabolic process | 0.001066664 | 21 | VCP/HSP90AB1/BAG6/PSMC4/PSMC1/PSMC2/PSMD14/RAD23B/UBAC2/RACK1/RPL23/RPL5/PSME3/PRKACA/CLU/OGT/RPL11/STUB1/CAV1/TMTC3/PLK1                                                                                              |
| GO:0022406 | membrane docking                                                         | 0.001067298 | 19 | HSP90AA1/CEP250/CKAP5/PPP2R1A/SCFD1/ACTR1A/CDK1/CEP83/CHP1/DYNC1I2/ESYT2/PRKACA/NDE1/IQCB1/RAB10/EXOC4/DCTN2/RAB7A/PLK1                                                                                                |
| GO:0051031 | tRNA transport                                                           | 0.001113525 | 9  | XPOT/NUP188/NUP160/RANBP2/NUP93/NUP210/RAN/NUP37/RAE1                                                                                                                                                                  |
| GO:0009260 | ribonucleotide biosynthetic process                                      | 0.001197859 | 25 | VCP/ATP5F1A/FASN/NUP188/NUP160/RANBP2/STOML2/NUP93/PFKFB3/SLC25A1/PDHB/HSD17B12/NUP210/IMP2H2/PPT1/NUP37/GART/OGT/CYC1/SCD/DLAT/ATP5F1D/PDHA1/ATP5PD/RAE1                                                              |
| GO:0009205 | purine ribonucleoside triphosphate metabolic process                     | 0.001272874 | 27 | VCP/ATP5F1A/NUP188/NUP160/RANBP2/STOML2/NUP93/PFKFB3/OPA1/NDUFA9/NUP210/NDUFS2/CDK1/IMP2H2/RAN/NUP37/NDUFS3/OGT/CYC1/SDHA/ATP6V1A/ATP5F1D/NDUFA13/NDUFB10/ATP5PD/RAE1/NDUFA8                                           |

|            |                                                       |             |    |                                                                                                                                                                                 |
|------------|-------------------------------------------------------|-------------|----|---------------------------------------------------------------------------------------------------------------------------------------------------------------------------------|
| GO:0061136 | regulation of proteasomal protein catabolic process   | 0.001641862 | 19 | VCP/HSP90AB1/BAG6/PSMC4/PSMC1/PSMC2/PSMD14/RAD23B/UBAC2/RACK1/PSME3/PRKACA/CLU/OGT/RPL11/STUB1/CAV1/TMTC3/PLK1                                                                  |
| GO:0009167 | purine ribonucleoside monophosphate metabolic process | 0.001705084 | 27 | VCP/ATP5F1A/NUP188/NUP160/RANBP2/STOML2/NUP93/PFKFB3/NDUFA9/NUP210/NDUFS2/CDK1/IMPDH2/NUP37/GART/NDUFS3/OGT/CYC1/NT5C2/S DHA/ATP6V1A/ATP5F1D/NDUFA13/NDUFB10/ATP5PD/RAE1/NDUFA8 |
| GO:0009126 | purine nucleoside monophosphate metabolic process     | 0.001806065 | 27 | VCP/ATP5F1A/NUP188/NUP160/RANBP2/STOML2/NUP93/PFKFB3/NDUFA9/NUP210/NDUFS2/CDK1/IMPDH2/NUP37/GART/NDUFS3/OGT/CYC1/NT5C2/S DHA/ATP6V1A/ATP5F1D/NDUFA13/NDUFB10/ATP5PD/RAE1/NDUFA8 |
| GO:0009199 | ribonucleoside triphosphate metabolic process         | 0.001806065 | 27 | VCP/ATP5F1A/NUP188/NUP160/RANBP2/STOML2/NUP93/PFKFB3/OPA1/ND UFA9/NUP210/NDUFS2/CDK1/IMPDH2/RAN/NUP37/NDUFS3/OGT/CYC1/SDH A/ATP6V1A/ATP5F1D/NDUFA13/NDUFB10/ATP5PD/RAE1/NDUFA8  |
| GO:0097064 | ncRNA export from nucleus                             | 0.001835331 | 9  | XPOT/NUP188/NUP160/RANBP2/NUP93/NUP210/RAN/NUP37/RAE1                                                                                                                           |
| GO:0006164 | purine nucleotide biosynthetic process                | 0.00186174  | 25 | VCP/ATP5F1A/FASN/NUP188/NUP160/RANBP2/STOML2/NUP93/PFKFB3/SL C25A1/PDHB/HSD17B12/NUP210/IMPDH2/PPT1/NUP37/GART/OGT/CYC1/S CD/DLAT/ATP5F1D/PDHA1/ATP5PD/RAE1                     |
| GO:0046390 | ribose phosphate biosynthetic process                 | 0.00186174  | 25 | VCP/ATP5F1A/FASN/NUP188/NUP160/RANBP2/STOML2/NUP93/PFKFB3/SL C25A1/PDHB/HSD17B12/NUP210/IMPDH2/PPT1/NUP37/GART/OGT/CYC1/S CD/DLAT/ATP5F1D/PDHA1/ATP5PD/RAE1                     |
| GO:0009144 | purine nucleoside triphosphate metabolic process      | 0.001910411 | 27 | VCP/ATP5F1A/NUP188/NUP160/RANBP2/STOML2/NUP93/PFKFB3/OPA1/ND UFA9/NUP210/NDUFS2/CDK1/IMPDH2/RAN/NUP37/NDUFS3/OGT/CYC1/SDH A/ATP6V1A/ATP5F1D/NDUFA13/NDUFB10/ATP5PD/RAE1/NDUFA8  |
| GO:0006405 | RNA export from nucleus                               | 0.002243885 | 16 | XPO1/XPOT/NUP188/NUP160/RANBP2/NUP93/AKAP8L/RPS15/NUP210/HNR NPA1/DHX9/RAN/NUP37/RAE1/THOC3/PABPN1                                                                              |
| GO:0006695 | cholesterol biosynthetic process                      | 0.00226254  | 12 | KPNB1/FASN/ERLIN2/ERLIN1/CYP51A1/LBR/DHCR7/FDFT1/RAN/DHCR24/S CD/SQLE                                                                                                           |
| GO:1903829 | positive regulation of cellular protein localization  | 0.00227402  | 26 | HUWE1/IPO5/SPTBN1/FLNA/HSP90AB1/TCP1/NMT1/TRIM28/STOM/CEP250/ EMD/SQSTM1/RACK1/UBR5/SAR1A/ITGB1/CDK1/CHP1/RAN/MFF/PRKACA/ GNL3/TARDBP/TM9SF4/TFDP1/PLK1                         |
| GO:0045540 | regulation of cholesterol biosynthetic process        | 0.002307338 | 10 | KPNB1/FASN/ERLIN2/ERLIN1/CYP51A1/DHCR7/FDFT1/RAN/SCD/SQLE                                                                                                                       |
| GO:0106118 | regulation of sterol biosynthetic process             | 0.002307338 | 10 | KPNB1/FASN/ERLIN2/ERLIN1/CYP51A1/DHCR7/FDFT1/RAN/SCD/SQLE                                                                                                                       |
| GO:0031647 | regulation of protein stability                       | 0.002440396 | 24 | PRKDC/FLNA/HSP90AB1/TCP1/BAG6/HSP90AA1/TELO2/NCLN/USP9X/GET 4/CALR/RPL23/ATP1B3/RPL5/CHP1/CLU/P3H1/RPL11/TARDBP/STUB1/DER L1/CRTAP/PTGES3/PLK1                                  |
| GO:1902653 | secondary alcohol biosynthetic process                | 0.002619093 | 12 | KPNB1/FASN/ERLIN2/ERLIN1/CYP51A1/LBR/DHCR7/FDFT1/RAN/DHCR24/S CD/SQLE                                                                                                           |
| GO:1903362 | regulation of cellular protein catabolic process      | 0.002947479 | 22 | VCP/HSP90AB1/BAG6/PSMC4/PSMC1/PSMC2/HSP90AA1/PSMD14/RAD23B /UBAC2/RACK1/RPL23/RPL5/PSME3/PRKACA/CLU/OGT/RPL11/STUB1/CAV 1/TMTC3/PLK1                                            |
| GO:0000027 | ribosomal large subunit assembly                      | 0.002975837 | 8  | RPL3/RPL6/RPL5/RPL10/RPL12/RPL24/RPL11/RPL23A                                                                                                                                   |

|            |                                                                            |             |    |                                                                                                                                                                                 |
|------------|----------------------------------------------------------------------------|-------------|----|---------------------------------------------------------------------------------------------------------------------------------------------------------------------------------|
| GO:0009895 | negative regulation of catabolic process                                   | 0.003023147 | 25 | FLNA/GOLGA2/HSP90AB1/BAG6/LRPPRC/HNRNPU/CYP51A1/SF3B3/PABPC1/UBAC2/TAB2/TAB3/RPL23/NAMPT/THRAP3/SCFD1/RPL5/DHX9/SEC22B/SNRNP70/HNRNPA0/OGT/RPL11/TARDBP/HNRNPD                  |
| GO:0006403 | RNA localization                                                           | 0.003495842 | 21 | XPO1/XPOT/TCP1/NUP188/NUP160/RANBP2/LRPPRC/HNRNPU/NUP93/CKAP5/AKAP8L/RPS15/NUP210/HNRNPA1/DHX9/RAN/NUP37/FBL/RAE1/THOC3/PABPN1                                                  |
| GO:0050657 | nucleic acid transport                                                     | 0.00369831  | 19 | XPO1/XPOT/NUP188/NUP160/RANBP2/LRPPRC/HNRNPU/NUP93/CKAP5/AKAP8L/RPS15/NUP210/HNRNPA1/DHX9/RAN/NUP37/RAE1/THOC3/PABPN1                                                           |
| GO:0050658 | RNA transport                                                              | 0.00369831  | 19 | XPO1/XPOT/NUP188/NUP160/RANBP2/LRPPRC/HNRNPU/NUP93/CKAP5/AKAP8L/RPS15/NUP210/HNRNPA1/DHX9/RAN/NUP37/RAE1/THOC3/PABPN1                                                           |
| GO:0009161 | ribonucleoside monophosphate metabolic process                             | 0.003725158 | 27 | VCP/ATP5F1A/NUP188/NUP160/RANBP2/STOML2/NUP93/PFKFB3/NDUFA9/NUP210/NDUFS2/CDK1/IMPDH2/NUP37/GART/NDUFS3/OGT/CYC1/NT5C2/S/DHA/ATP6V1A/ATP5F1D/NDUFA13/NDUFB10/ATP5PD/RAE1/NDUFA8 |
| GO:1903320 | regulation of protein modification by small protein conjugation or removal | 0.003747829 | 21 | HUWE1/VCP/HSPA5/OTUD4/FANCI/GOLGA2/HSP90AB1/HSP90AA1/IVNS1A/BP/UBR5/RPL23/RPL5/CHP1/OGT/GNL3/RPL11/STUB1/CAV1/DERL1/NDFIP1/PLK1                                                 |
| GO:1900034 | regulation of cellular response to heat                                    | 0.004011704 | 12 | HSP90AB1/DNAJC7/NUP188/HSP90AA1/NUP160/RANBP2/NUP93/DNAJB1/NUP210/NUP37/RAE1/PTGES3                                                                                             |
| GO:0072522 | purine-containing compound biosynthetic process                            | 0.00405553  | 25 | VCP/ATP5F1A/FASN/NUP188/NUP160/RANBP2/STOML2/NUP93/PFKFB3/SLC25A1/PDHB/HSD17B12/NUP210/IMPDH2/PPT1/NUP37/GART/OGT/CYC1/SCD/DLAT/ATP5F1D/PDHA1/ATP5PD/RAE1                       |
| GO:0006986 | response to unfolded protein                                               | 0.004073271 | 18 | VCP/HSPA5/CANX/HSP90AB1/HSP90AA1/FAF2/HSP90B1/RACK1/STT3B/CALR/DNAJB1/AMFR/CLGN/SRPRB/TMEM33/SSR1/STUB1/DERL1                                                                   |
| GO:0007030 | Golgi organization                                                         | 0.004430565 | 16 | PRMT5/GOLGA2/GCC2/NPLOC4/LMAN1/ZW10/TMED10/ARL1/CDK1/CAMSA P3/LMAN2/TMED9/STX18/TMED5/ARHGAP21/TMED1                                                                            |
| GO:0051236 | establishment of RNA localization                                          | 0.004662704 | 19 | XPO1/XPOT/NUP188/NUP160/RANBP2/LRPPRC/HNRNPU/NUP93/CKAP5/AKAP8L/RPS15/NUP210/HNRNPA1/DHX9/RAN/NUP37/RAE1/THOC3/PABPN1                                                           |
| GO:0050821 | protein stabilization                                                      | 0.004799309 | 18 | FLNA/HSP90AB1/TCP1/BAG6/HSP90AA1/TELO2/NCLN/USP9X/CALR/RPL23/ATP1B3/RPL5/CHP1/CLU/P3H1/RPL11/CRTAP/PTGES3                                                                       |
| GO:0006606 | protein import into nucleus                                                | 0.004864381 | 16 | IPO8/IPO5/KPNB1/FLNA/CSE1L/NUP188/TRIM28/RANBP2/NUP93/RANBP6/NF1/UBR5/RPL23/CHP1/RAN/TARDBP                                                                                     |
| GO:0097711 | ciliary basal body-plasma membrane docking                                 | 0.00489465  | 13 | HSP90AA1/CEP250/CKAP5/PPP2R1A/ACTR1A/CDK1/CEP83/DYNC112/PRKACA/NDE1/IQCB1/DCTN2/PLK1                                                                                            |
| GO:0016126 | sterol biosynthetic process                                                | 0.005267919 | 12 | KPNB1/FASN/ERLIN2/ERLIN1/CYP51A1/LBR/DHCR7/FDFT1/RAN/DHCR24/SCD/SQLE                                                                                                            |

|            |                                                           |             |    |                                                                                                                                                                                |
|------------|-----------------------------------------------------------|-------------|----|--------------------------------------------------------------------------------------------------------------------------------------------------------------------------------|
| GO:0006839 | mitochondrial transport                                   | 0.005349274 | 22 | HUWE1/ATP5F1A/HSP90AA1/LMAN1/NMT1/STOML2/OPA1/TOMM40/HAX1/TIMM50/SLC25A1/MTX2/TIMM23B/SAMM50/AGK/MFF/CYC1/TFDP1/ATP5F1D/NDUFA13/ATP5PD/DYNLT1                                  |
| GO:0009141 | nucleoside triphosphate metabolic process                 | 0.00570192  | 27 | VCP/ATP5F1A/NUP188/NUP160/RANBP2/STOML2/NUP93/PFKFB3/OPA1/NDUFA9/NUP210/NDUFS2/CDK1/IMPDH2/RAN/NUP37/NDUFS3/OGT/CYC1/SDHA/ATP6V1A/ATP5F1D/NDUFA13/NDUFB10/ATP5PD/RAE1/NDUFA8   |
| GO:0071166 | ribonucleoprotein complex localization                    | 0.00576139  | 15 | XPO1/XPOT/PRPF31/NUP188/NUP160/RANBP2/NUP93/AKAP8L/RPS15/NUP210/RAN/NUP37/RAE1/THOC3/PABPN1                                                                                    |
| GO:1902850 | microtubule cytoskeleton organization involved in mitosis | 0.00773463  | 15 | VCP/KPNB1/FLNA/GOLGA2/HNRNPU/ZW10/CLTC/SUN2/ACTR1A/RAN/NDE1/DCTN2/DYNLT1/RAE1/PLK1                                                                                             |
| GO:0009266 | response to temperature stimulus                          | 0.008443964 | 21 | VCP/HSPA5/ATP2A2/HSP90AB1/DNAJA2/DNAJC7/NUP188/HSP90AA1/NUP160/RANBP2/NUP93/NF1/DNAJB1/NUP210/PRKACA/NUP37/STUB1/EIF2B3/RAE1/EIF2B5/PTGES3                                     |
| GO:0046034 | ATP metabolic process                                     | 0.008591813 | 24 | VCP/ATP5F1A/NUP188/NUP160/RANBP2/STOML2/NUP93/PFKFB3/NDUFA9/NUP210/NDUFS2/CDK1/NUP37/NDUFS3/OGT/CYC1/SDHA/ATP6V1A/ATP5F1D/NDUFA13/NDUFB10/ATP5PD/RAE1/NDUFA8                   |
| GO:0031330 | negative regulation of cellular catabolic process         | 0.008885257 | 22 | GOLGA2/HSP90AB1/BAG6/LRPPRC/HNRNPU/PABPC1/UBAC2/TAB2/TAB3/RPL23/NAMPT/THRAP3/SCFD1/RPL5/DHX9/SEC22B/SNRNP70/HNRNPA0/OGT/RPL11/TARDBP/HNRNPD                                    |
| GO:0042273 | ribosomal large subunit biogenesis                        | 0.009153494 | 11 | RPL3/RPL6/RPL5/RPL10/RPL12/RPL14/RPL24/RPL11/RPL10A/RPL23A/RPL35                                                                                                               |
| GO:0006890 | retrograde vesicle-mediated transport, Golgi to ER        | 0.010071191 | 12 | ZW10/TMED10/COPA/SCFD1/LMAN2/COPG1/SEC22B/ARCN1/ARF4/TMED9/STX18/KIF5A                                                                                                         |
| GO:0140056 | organelle localization by membrane tethering              | 0.010084308 | 17 | HSP90AA1/CEP250/CKAP5/PPP2R1A/SCFD1/ACTR1A/CDK1/CEP83/DYNC112/ESYT2/PRKACA/NDE1/IQCB1/RAB10/EXOC4/DCTN2/PLK1                                                                   |
| GO:0006984 | ER-nucleus signaling pathway                              | 0.010156886 | 9  | HSPA5/ATP2A2/ERLIN2/ERLIN1/HSP90B1/CALR/CCDC47/TMEM33/TMCO1                                                                                                                    |
| GO:0007006 | mitochondrial membrane organization                       | 0.010272485 | 15 | IMMT/ATP5F1A/HSP90AA1/NMT1/OPA1/TIMM50/DNAJC11/CHCHD3/SAMM50/AGK/TFDP1/ATP5F1D/NDUFA13/ATP5PD/DYNLT1                                                                           |
| GO:0075522 | IRES-dependent viral translational initiation             | 0.010480273 | 5  | EIF3B/EIF3A/PCBP2/EIF3F/PTBP1                                                                                                                                                  |
| GO:0007051 | spindle organization                                      | 0.010921976 | 17 | VCP/KPNB1/FLNA/MYH9/GOLGA2/HNRNPU/TUBGCP4/TUBGCP3/CKAP5/PPP2R1A/CLTC/SUN2/RAN/TUBGCP2/DCTN2/RAE1/PLK1                                                                          |
| GO:0009123 | nucleoside monophosphate metabolic process                | 0.011071488 | 27 | VCP/ATP5F1A/NUP188/NUP160/RANBP2/STOML2/NUP93/PFKFB3/NDUFA9/NUP210/NDUFS2/CDK1/IMPDH2/NUP37/GART/NDUFS3/OGT/CYC1/NT5C2/SDHA/ATP6V1A/ATP5F1D/NDUFA13/NDUFB10/ATP5PD/RAE1/NDUFA8 |
| GO:0034250 | positive regulation of cellular amide metabolic process   | 0.011863238 | 16 | EEF2/PABPC1/RACK1/RPS4X/DDX3X/RPL5/DHX9/EIF2S3/CLU/RPS27L/VIM/HNRNPD/RPS9/EIF2B5/CDC123/CCN1                                                                                   |



|            |                                                                                         |             |    |                                                                                                                                                                                           |
|------------|-----------------------------------------------------------------------------------------|-------------|----|-------------------------------------------------------------------------------------------------------------------------------------------------------------------------------------------|
| GO:0045899 | positive regulation of RNA polymerase II transcriptional preinitiation complex assembly | 0.018771844 | 5  | PSMC3/PSMC4/PSMC5/PSMC2/PSMC6                                                                                                                                                             |
| GO:0090181 | regulation of cholesterol metabolic process                                             | 0.020838646 | 10 | KPNB1/FASN/ERLIN2/ERLIN1/CYP51A1/DHCR7/FDFT1/RAN/SCD/SQLE                                                                                                                                 |
| GO:0034248 | regulation of cellular amide metabolic process                                          | 0.022452866 | 31 | GCN1/EIF4B/EIF3B/TNRC6B/EEF2/LRPPRC/LTN1/PABPC1/RACK1/TMED10/RPS4X/CALR/DDX3X/RPL5/RPL10/DHX9/EIF2S3/PPP1CA/EIF3H/SNRNP70/GEMIN5/CLU/RPS27L/VIM/CNOT1/HNRNPD/RPS9/EIF5/EIF2B5/CDC123/CCN1 |
| GO:0000028 | ribosomal small subunit assembly                                                        | 0.024676547 | 6  | RPSA/RPS15/RPS5/RPS19/RPS28/RPS27L                                                                                                                                                        |
| GO:0009108 | coenzyme biosynthetic process                                                           | 0.02580087  | 21 | FASN/NUP188/NUP160/RANBP2/NUP93/PFKFB3/NAMPT/SLC25A1/PDHB/HS D17B12/NDUFA9/NUP210/PPT1/MAT2A/NUP37/GART/OGT/SCD/DLAT/PDHA1/RAE1                                                           |
| GO:0071426 | ribonucleoprotein complex export from nucleus                                           | 0.02617977  | 14 | XPO1/XPOT/NUP188/NUP160/RANBP2/NUP93/AKAP8L/RPS15/NUP210/RAN/NUP37/RAE1/THOC3/PABPN1                                                                                                      |
| GO:0009127 | purine nucleoside monophosphate biosynthetic process                                    | 0.029490097 | 17 | VCP/ATP5F1A/NUP188/NUP160/RANBP2/STOML2/NUP93/PFKFB3/NUP210/IMPDH2/NUP37/GART/OGT/CYC1/ATP5F1D/ATP5PD/RAE1                                                                                |
| GO:0009168 | purine ribonucleoside monophosphate biosynthetic process                                | 0.029490097 | 17 | VCP/ATP5F1A/NUP188/NUP160/RANBP2/STOML2/NUP93/PFKFB3/NUP210/IMPDH2/NUP37/GART/OGT/CYC1/ATP5F1D/ATP5PD/RAE1                                                                                |
| GO:0031396 | regulation of protein ubiquitination                                                    | 0.032952967 | 18 | HUWE1/HSPA5/FANCI/GOLGA2/HSP90AB1/HSP90AA1/IVNS1ABP/UBR5/RPL23/RPL5/CHP1/OGT/RPL11/STUB1/CAV1/DERL1/NDFIP1/PLK1                                                                           |
| GO:0032386 | regulation of intracellular transport                                                   | 0.035722399 | 28 | HUWE1/XPO1/IPO5/ATP2A2/FLNA/MAP1B/GCC2/LMAN1/TRIM28/STOM/EMD/UBAC2/AKAP8L/NF1/UBR5/HAX1/RANGAP1/SCFD1/SAR1A/DHX9/CHP1/RAN/MFF/PRKACA/TARDBP/STX18/TM9SF4/TXN                              |
| GO:0042274 | ribosomal small subunit biogenesis                                                      | 0.036672899 | 10 | HEATR1/RPSA/RPS8/RPS15/RPS5/BMS1/RPS19/RPS28/RPS27L/NOM1                                                                                                                                  |
| GO:0043900 | regulation of multi-organism process                                                    | 0.045215419 | 27 | PSMC3/NPLOC4/TRIM28/STOM/HACD3/DDB1/PABPC1/PPP2R1A/PPM1B/CALR/PLSCR1/PCBP2/ZC3HAV1/EXOC7/DDX3X/IGF2R/UFD1/DHX9/ZMPSTE24/PRDX4/CFL1/TARDBP/CAV1/SMARCA4/DYNLT1/FAM3A/RAB7A                 |
| GO:0009206 | purine ribonucleoside triphosphate biosynthetic process                                 | 0.049355226 | 16 | VCP/ATP5F1A/NUP188/NUP160/RANBP2/STOML2/NUP93/PFKFB3/NUP210/IMPDH2/NUP37/OGT/CYC1/ATP5F1D/ATP5PD/RAE1                                                                                     |
| GO:0043248 | proteasome assembly                                                                     | 0.049846018 | 5  | PSMD13/ECPAS/PSMD11/PSMD4/ADRM1                                                                                                                                                           |
